# Supplementary material for: Visible-light-promoted radical acylation/cyclization of alkynoates with aldehydes for the synthesis of 3-acylcoumarins
Source: Royal Society of Chemistry journal article supplement (doi:10.1039/c8ob02232a), 2018-01-01

## *Supporting Information*

# **Visible-Light-Promoted Radical Acylation/Cyclization of Alkynoates with Aldehydes for the Synthesis of 3-Acylcoumarin**

Qiumei Wang, Chao Yang, Chao Jiang\*

School of Chemical Engineering, Nanjing University of Science and Technology, Nanjing, Jiangsu  
210094, China

\*E-mail: chaojiang@njust.edu.cn

### **Table of Contents**

|                                                                                      |    |
|--------------------------------------------------------------------------------------|----|
| 1. Detailed optimization studies of reaction conditions                              | S2 |
| 2. Light/Dark experiments                                                            | S4 |
| 3. <sup>1</sup> H and <sup>13</sup> C NMR spectra of starting materials and products | S5 |

## 1. Detailed Optimization Studies of Reaction Conditions

A mixture of **1** (0.1 mmol), aldehyde and catalyst, TBHP, base in solvent was stirred in a sealed tube at room temperature (28-33 °C) for 30 h. After completion of the reaction, the reaction mixture was purified by flash chromatography on silica gel with a mixture of petroleum ether and ethyl acetate (30:1~10:1) as eluent to give the desired product. Full details of the optimization were listed below (Tables S1-S4).

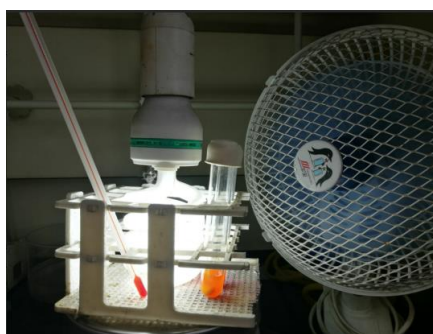

**Table S1.** Effect of Different Photoredox catalysts<sup>a</sup>

**1a** + **2a**  $\xrightarrow[\text{MeCN (1 mL), N}_2, \text{25 W CFL, rt}]{\text{photoredox catalyst, TBHP(3 equiv), K}_2\text{HPO}_4(2 \text{ equiv})}$  **3a**

| entry | photoredox catalyst(1mol % )                 | yield(%) <sup>b</sup> |
|-------|----------------------------------------------|-----------------------|
| 1     | Ru(bpy) <sub>3</sub> Cl <sub>2</sub>         | 80                    |
| 2     | Eosin Y                                      | 0                     |
| 3     | Ir(dtbbpy)(ppy) <sub>2</sub> PF <sub>6</sub> | 0                     |
| 4     | fac-Ir(ppy) <sub>3</sub>                     | 47                    |
| 5     | no                                           | 0                     |

<sup>a</sup>Reaction conditions: phenyl 3-phenylpropiolate (**1a**, 0.10 mmol), butyraldehyde (**2a**, 0.30 mmol), photoredox catalyst (1.0 mol %), TBHP (3.0 equiv), base (2.0 equiv), MeCN (1.0 mL) at room temperature under light irradiation in N<sub>2</sub> for 30 h. <sup>b</sup>Isolated yields.

**Table S2. Effect of Different Bases<sup>a</sup>**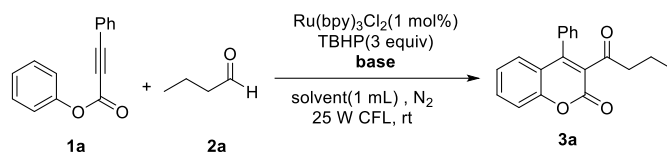

| entry | base (2 equiv)           | yield(%) <sup>b</sup> |
|-------|--------------------------|-----------------------|
| 1     | $\text{K}_2\text{HPO}_4$ | 80                    |
| 2     | $\text{KH}_2\text{PO}_4$ | 24                    |
| 3     | $\text{NaHCO}_3$         | 52                    |
| 4     | $\text{Cs}_2\text{CO}_3$ | 0                     |
| 5     | no                       | 0                     |

<sup>a</sup>Reaction conditions: phenyl 3-phenylpropiolate (**1a**, 0.10 mmol), butyraldehyde (**2a**, 0.30 mmol),  $\text{Ru(bpy)}_3\text{Cl}_2$  (1.0 mol %), TBHP (3.0 equiv), base (2.0 equiv), MeCN (1.0 mL) at room temperature under light irradiation in  $\text{N}_2$  for 30 h. <sup>b</sup>Isolated yields.

**Table S3. Effect of Different Solvents<sup>a</sup>**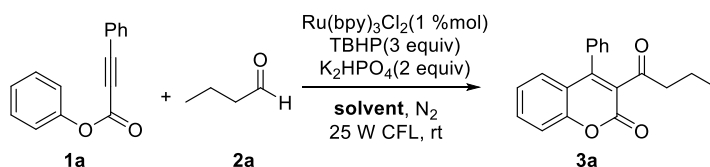

| entry | solvent(1 mL) | yield(%) <sup>b</sup> |
|-------|---------------|-----------------------|
| 1     | THF           | 0                     |
| 2     | Toluene       | 35                    |
| 3     | DCE           | 0                     |
| 4     | DME           | 24                    |
| 5     | MeCN          | 80                    |
| 6     | MeCN(0.5 mL)  | 65                    |
| 7     | MeCN(2 mL)    | 57                    |

<sup>a</sup>Reaction conditions: phenyl 3-phenylpropiolate (**1a**, 0.10 mmol), butyraldehyde (**2a**, 0.30 mmol),  $\text{Ru(bpy)}_3\text{Cl}_2$  (1.0 mol %), TBHP (3.0 equiv),  $\text{K}_2\text{HPO}_4$  (2.0 equiv), solvent (1.0 mL) at room temperature under light irradiation in  $\text{N}_2$  for 30 h. <sup>b</sup>Isolated yields.

**Table S4.** Effect of Different Light Sources<sup>a</sup>

| entry | light         | yield(%) <sup>b</sup> |
|-------|---------------|-----------------------|
| 1     | 25 W CFL      | 80                    |
| 2     | 13 W blue LED | 75                    |
| 3     | 36 W blue LED | 65                    |

<sup>a</sup>Reaction conditions: phenyl 3-phenylpropiolate (**1a**, 0.10 mmol), butyraldehyde (**2a**, 0.30 mmol), Ru(bpy)<sub>3</sub>Cl<sub>2</sub>(1.0 mol %), TBHP (3.0 equiv), K<sub>2</sub>HPO<sub>4</sub> (2.0 equiv), solvent (1.0 mL) at room temperature under light irradiation in N<sub>2</sub> for 30 h. <sup>b</sup>Isolated yields.

## 2. Light/Dark Experiment

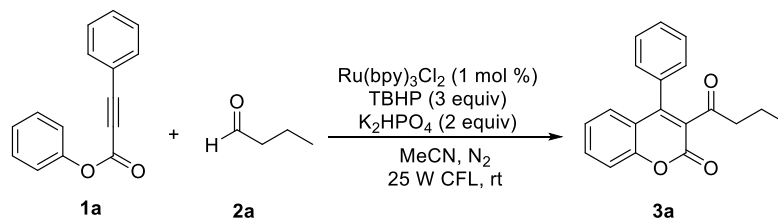

Set seven parallel reactions. A mixture of **1a** (0.1 mmol), **2a** (0.3 mmol) and Ru(bpy)<sub>3</sub>Cl<sub>2</sub> (1 mol %), TBHP (0.3 mmol), K<sub>2</sub>HPO<sub>4</sub> (0.2 mmol) in MeCN (1 mL) was stirred under 25 W CFL in atmosphere of N<sub>2</sub> in a sealed tube at room temperature for a certain time. After completion of the reaction, the reaction mixture was purified by a flash chromatography on silica gel with ethyl acetate as eluent to remove the solid impurities. The mixture was added 10 mg 1,3,5-trimethoxybenzene as the internal standard. After concentrating the mixture under vacuum, get its mixture <sup>1</sup>H NMR and its corresponding yield.

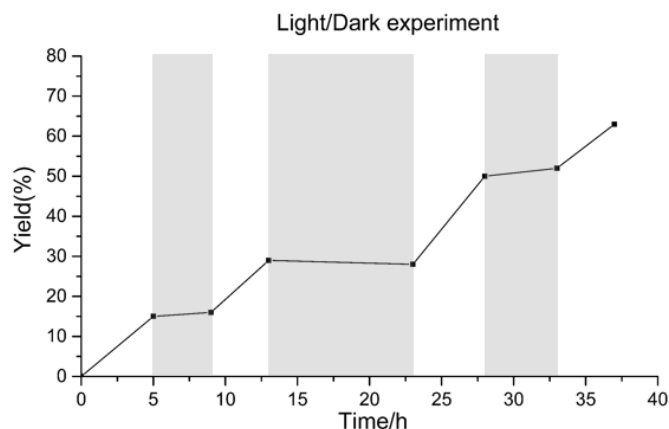**Figure S1.** Light/Dark Experiment

### 3. NMR spectra of compounds 3 and 4

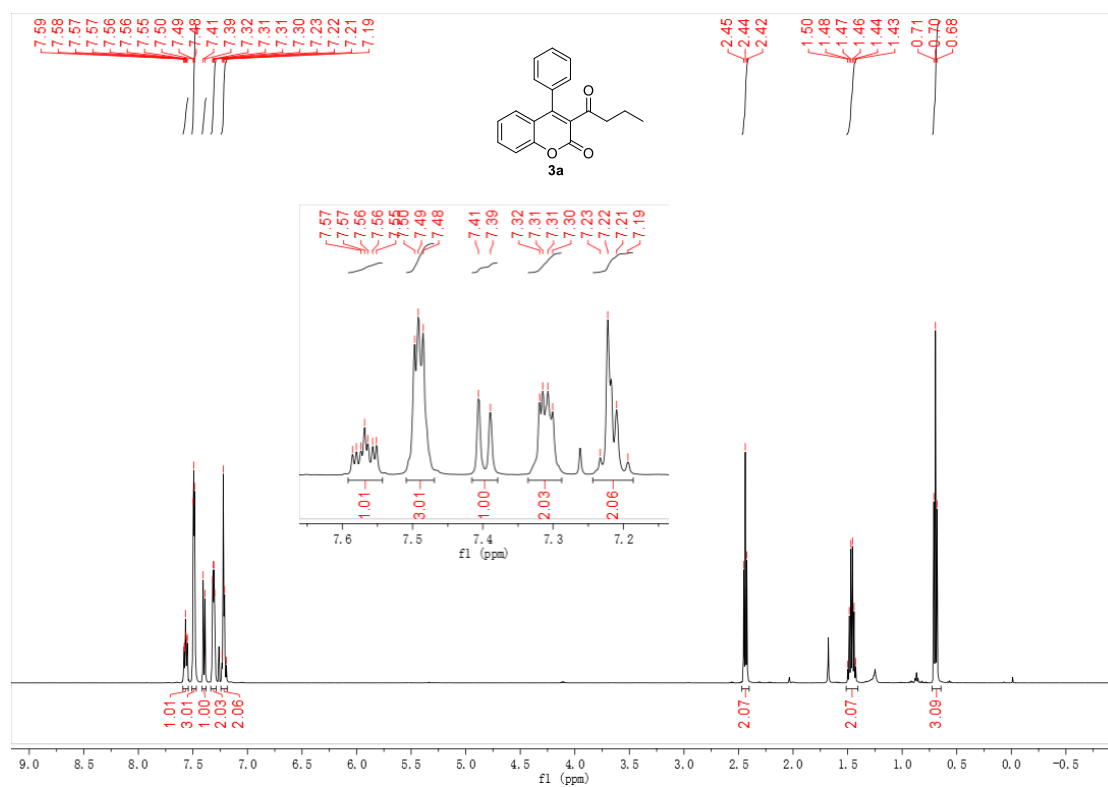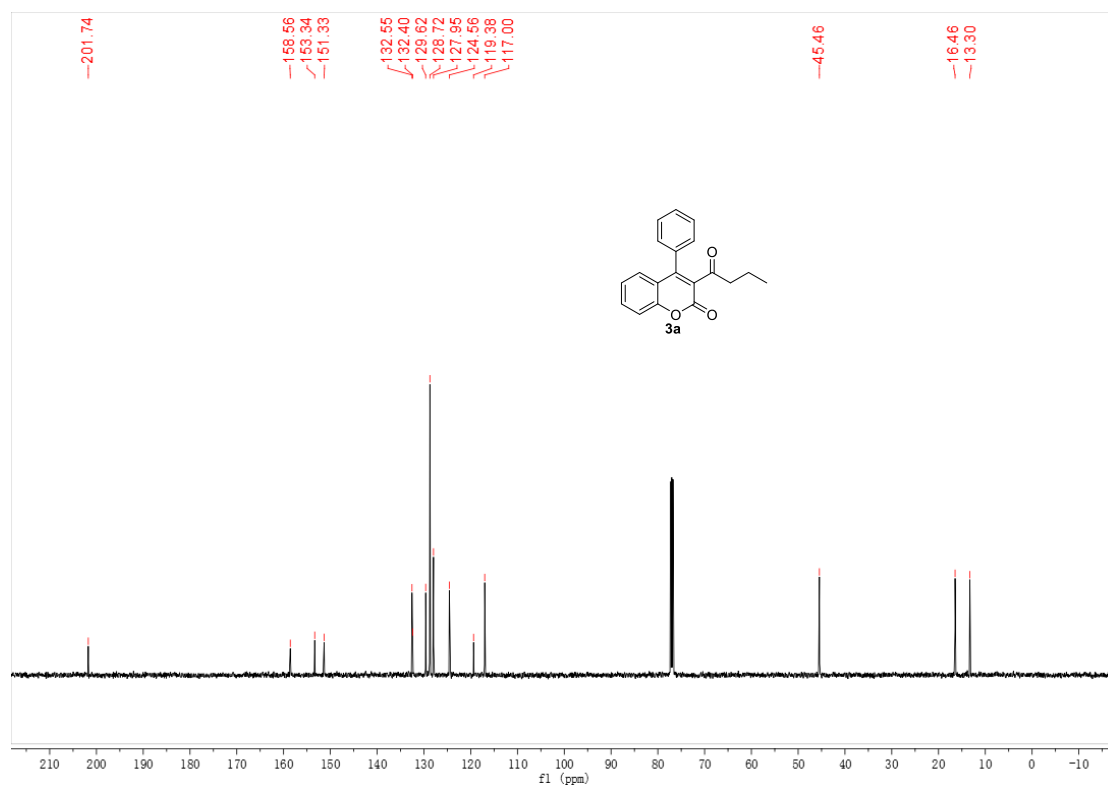

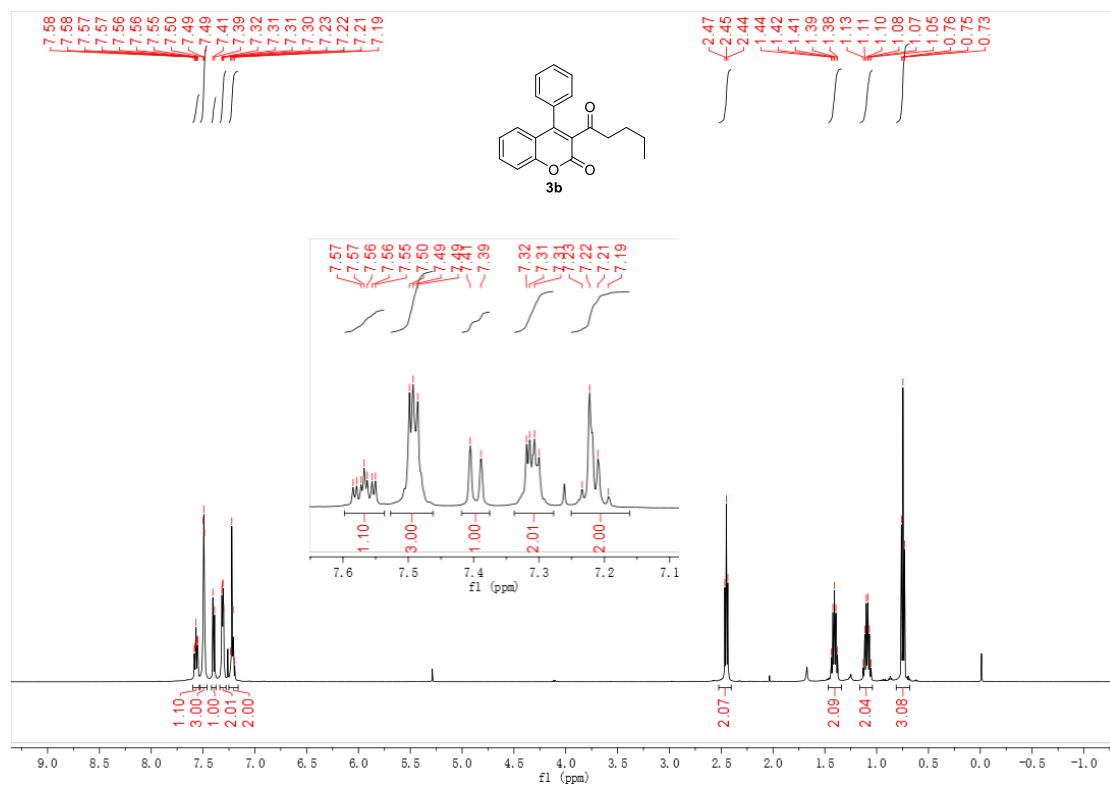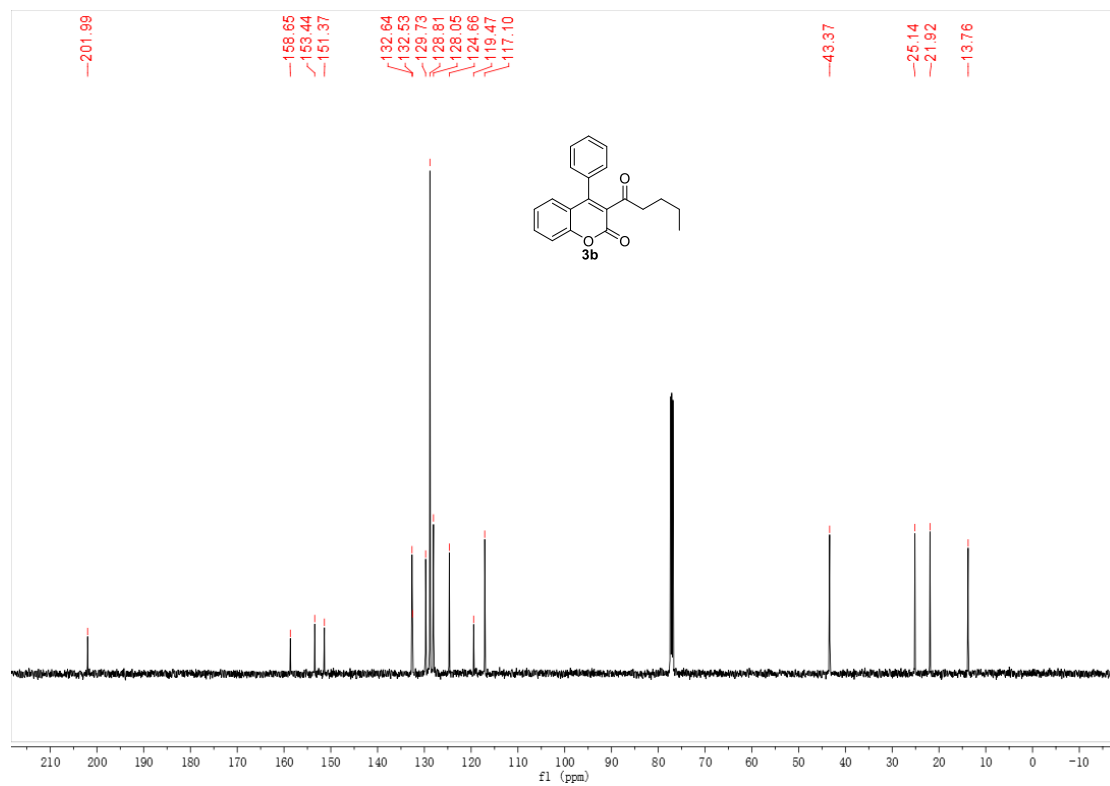

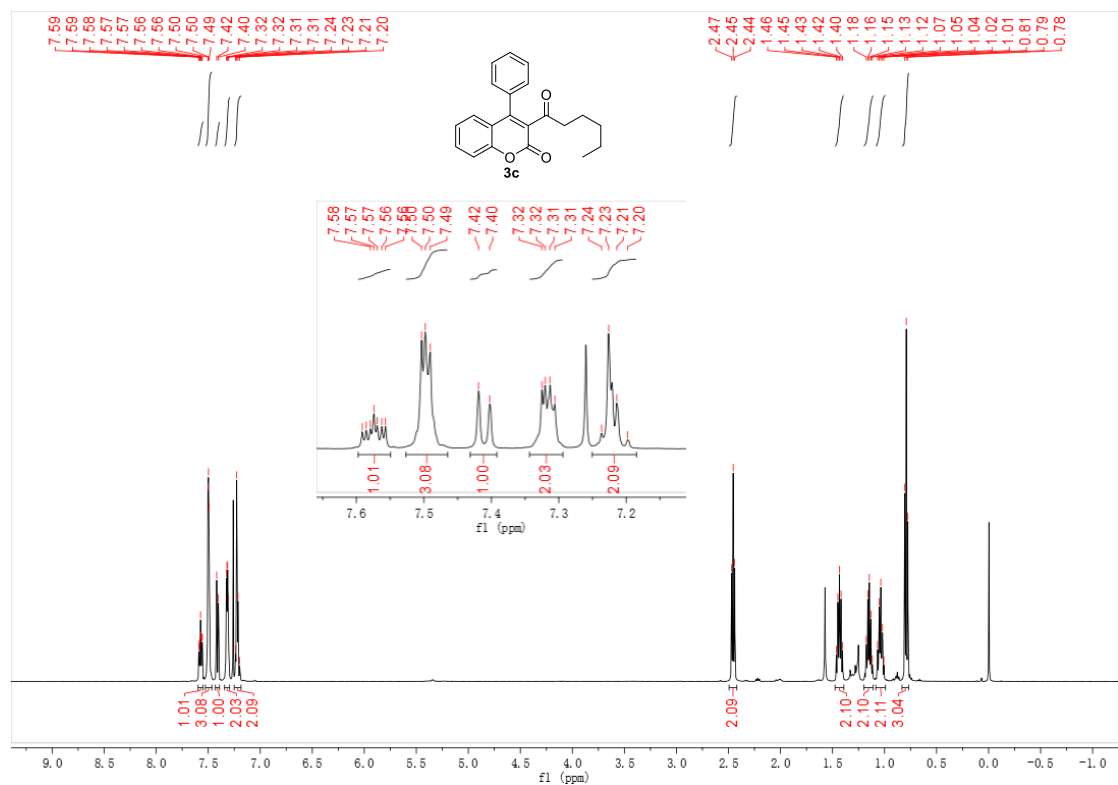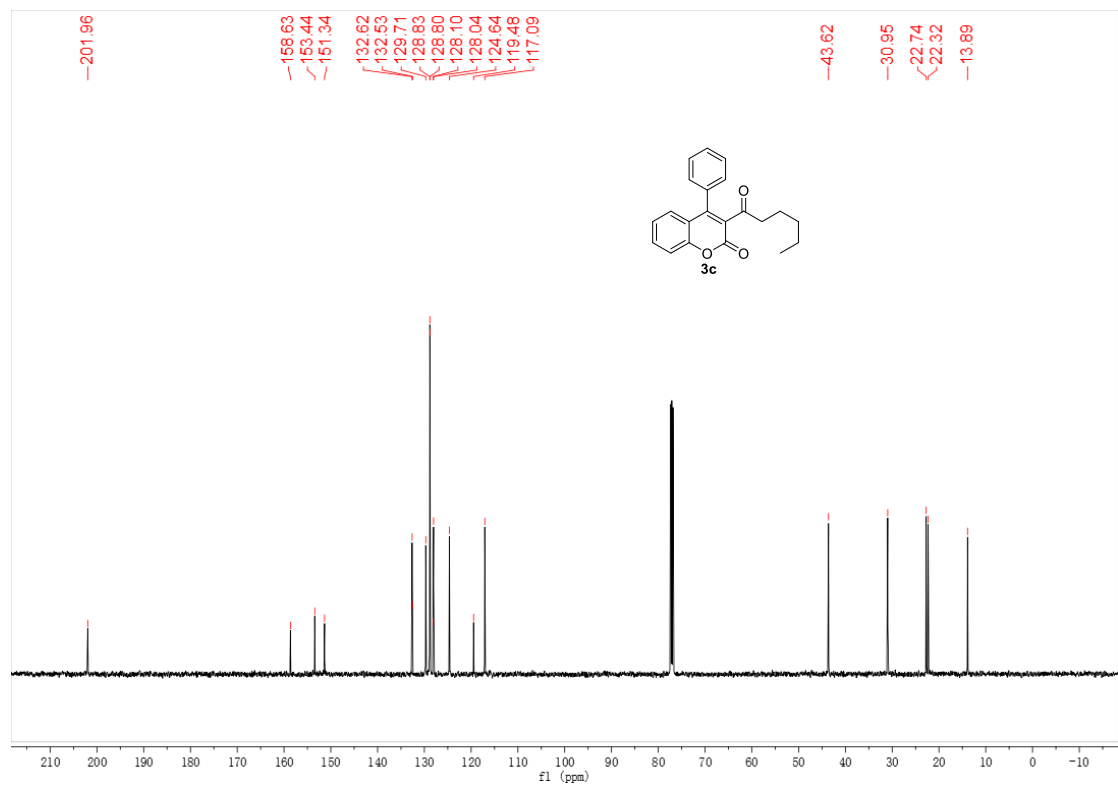

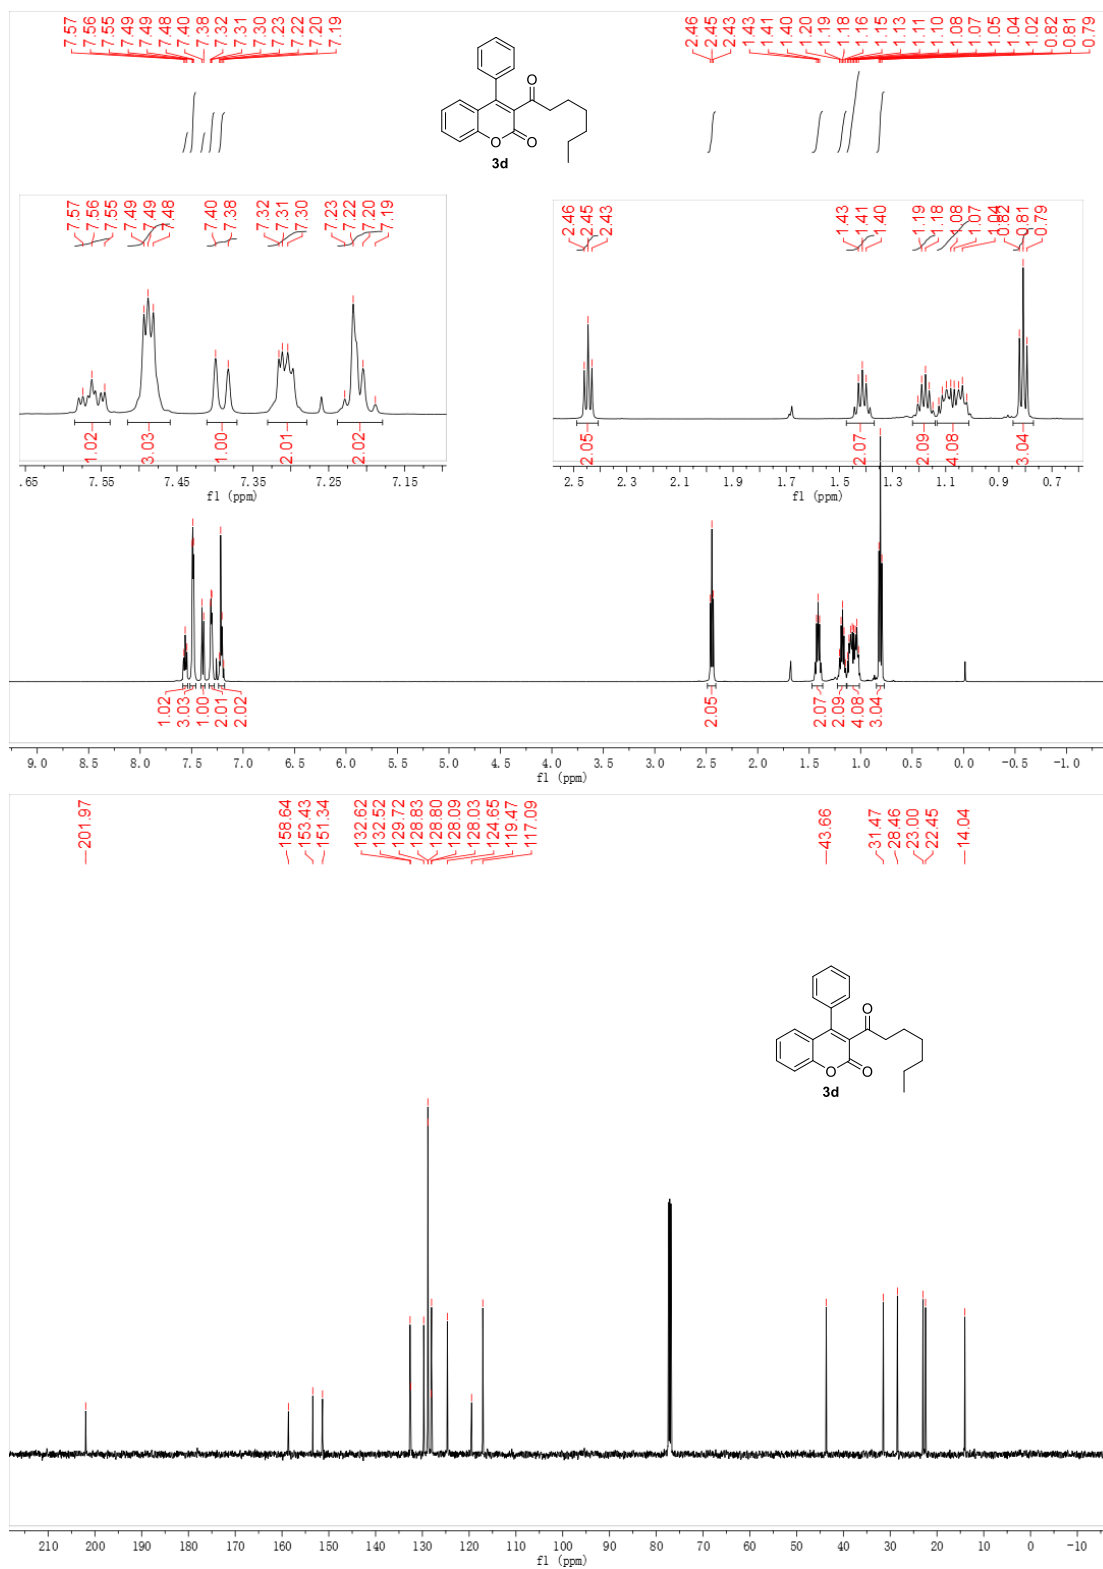



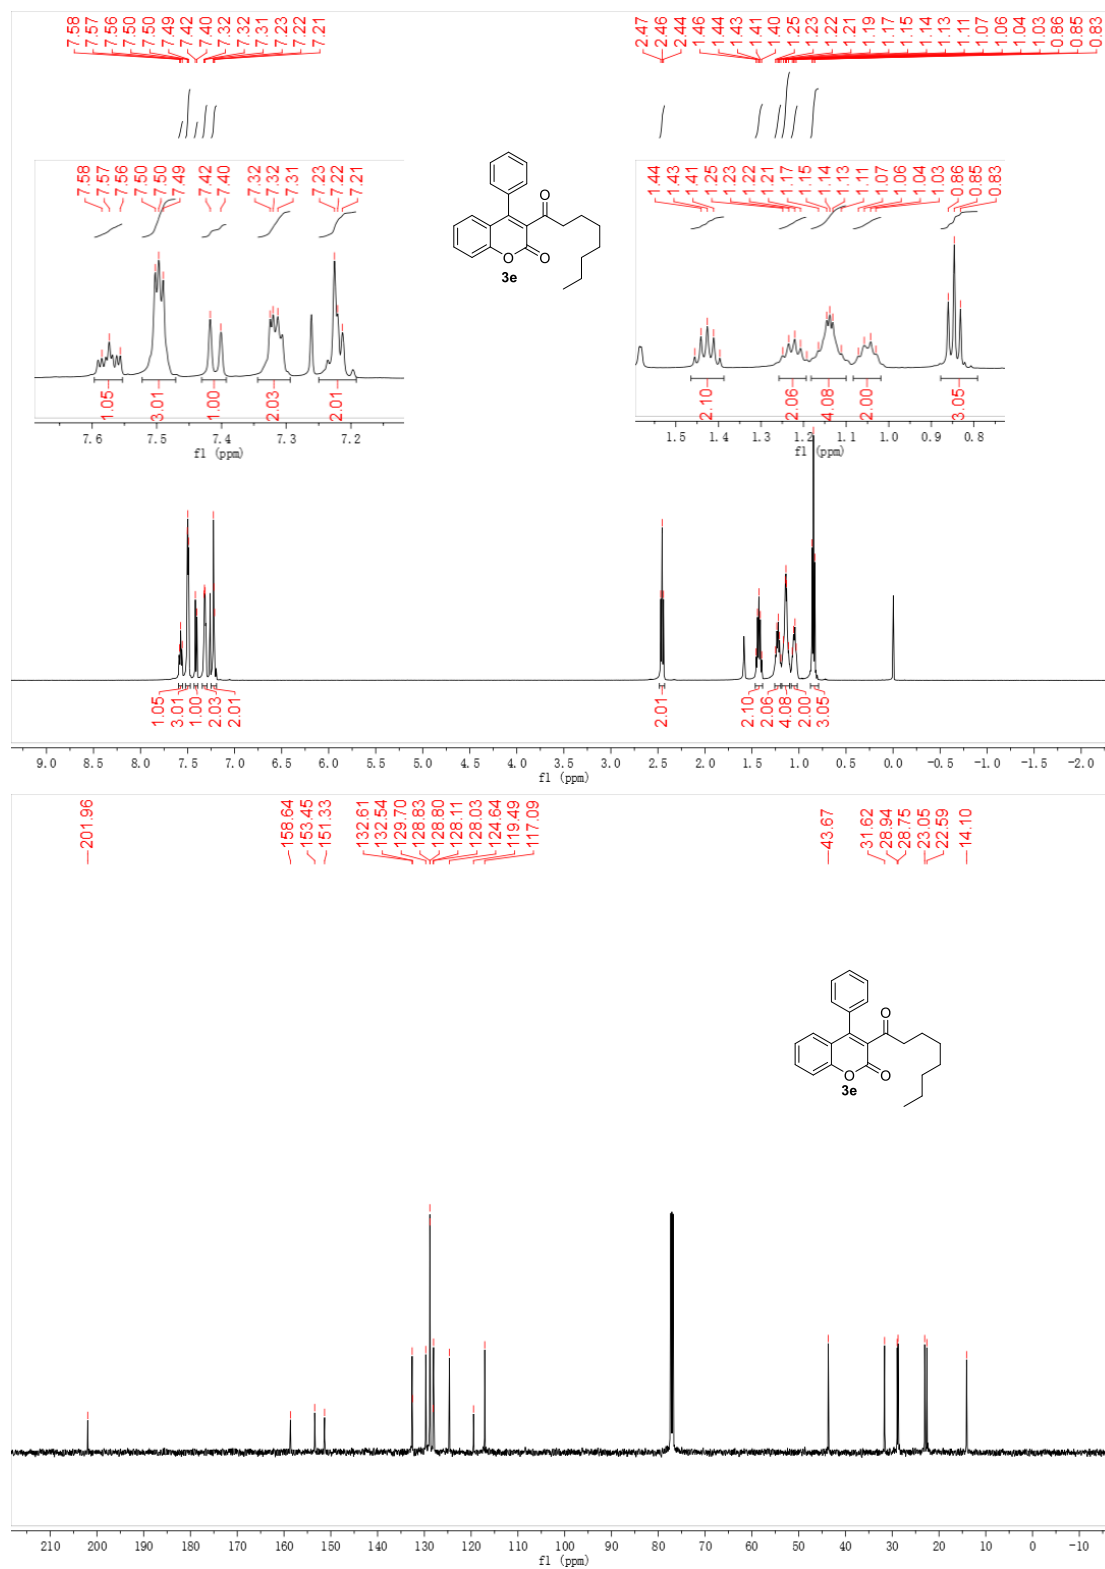

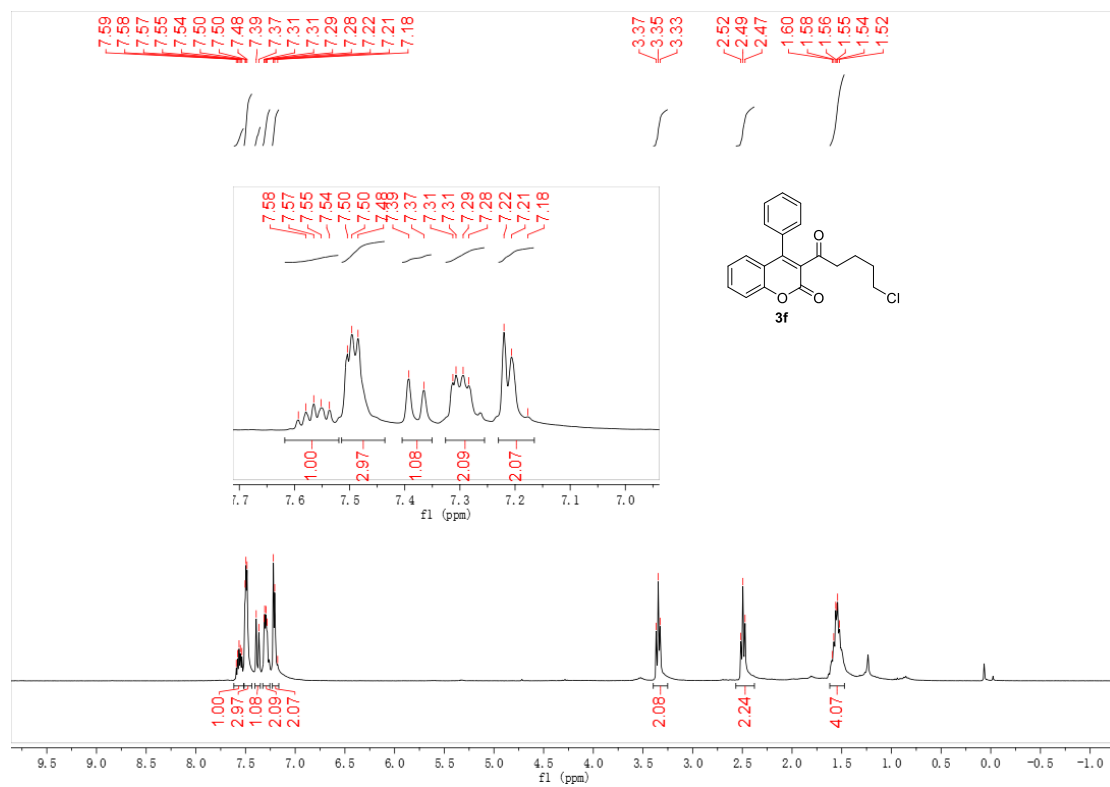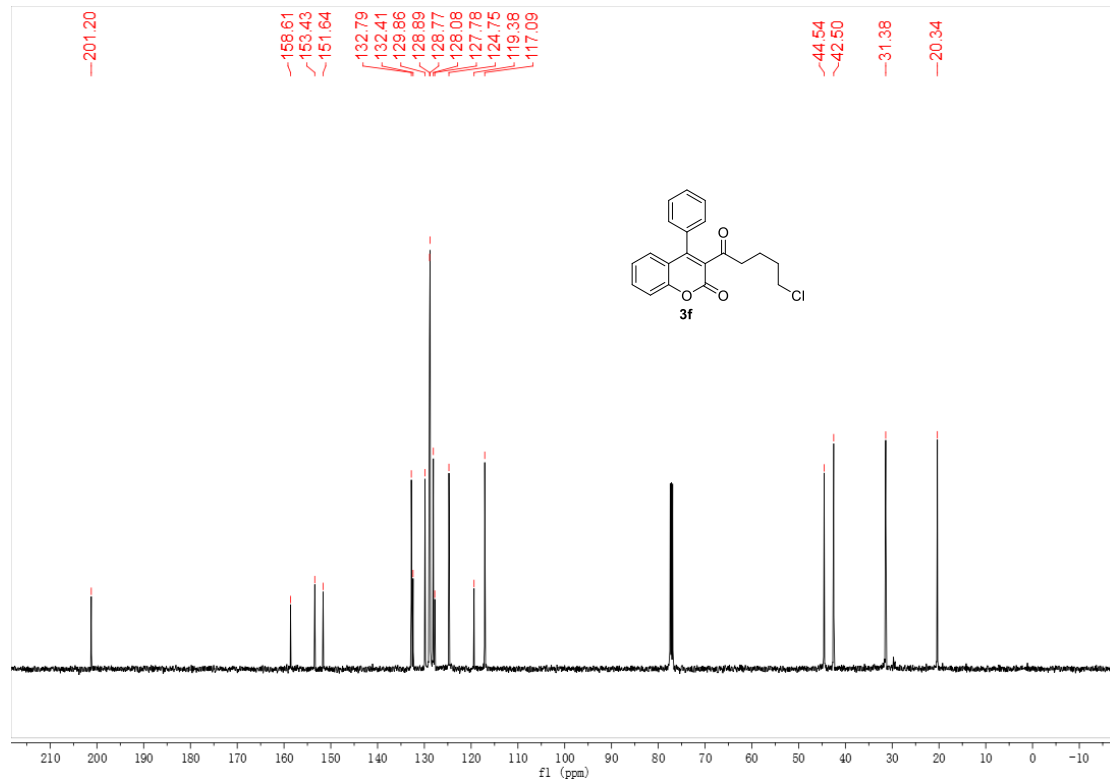

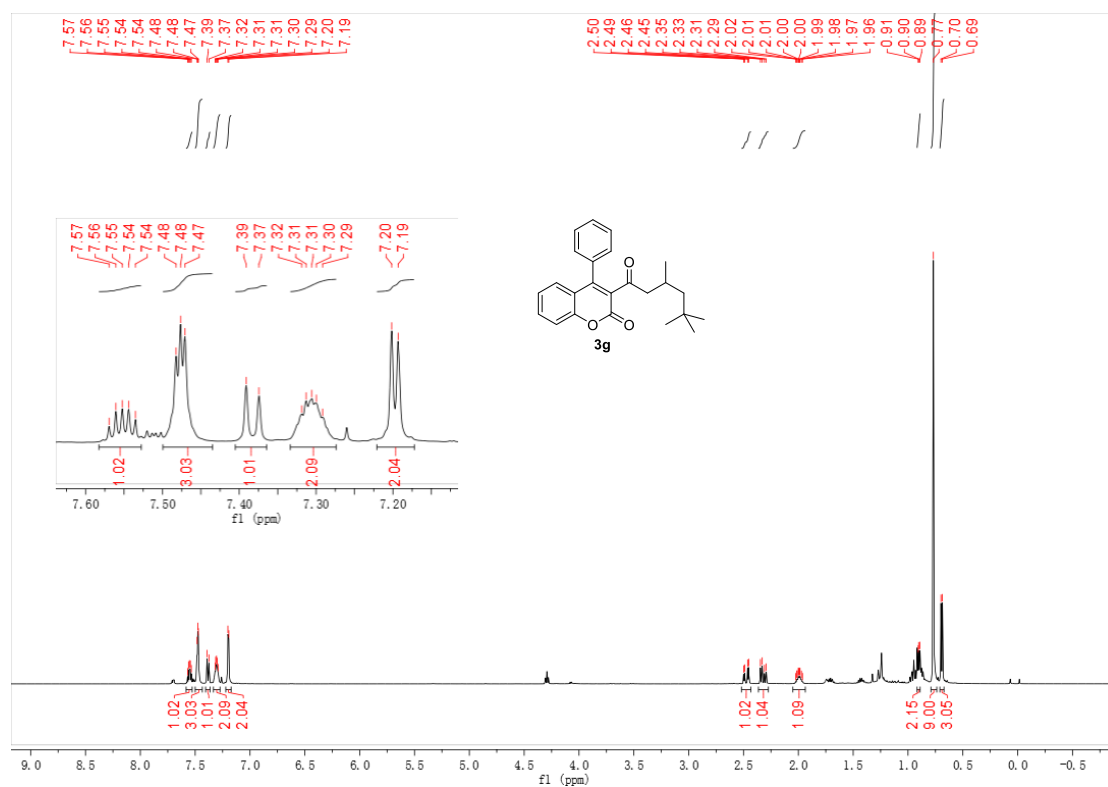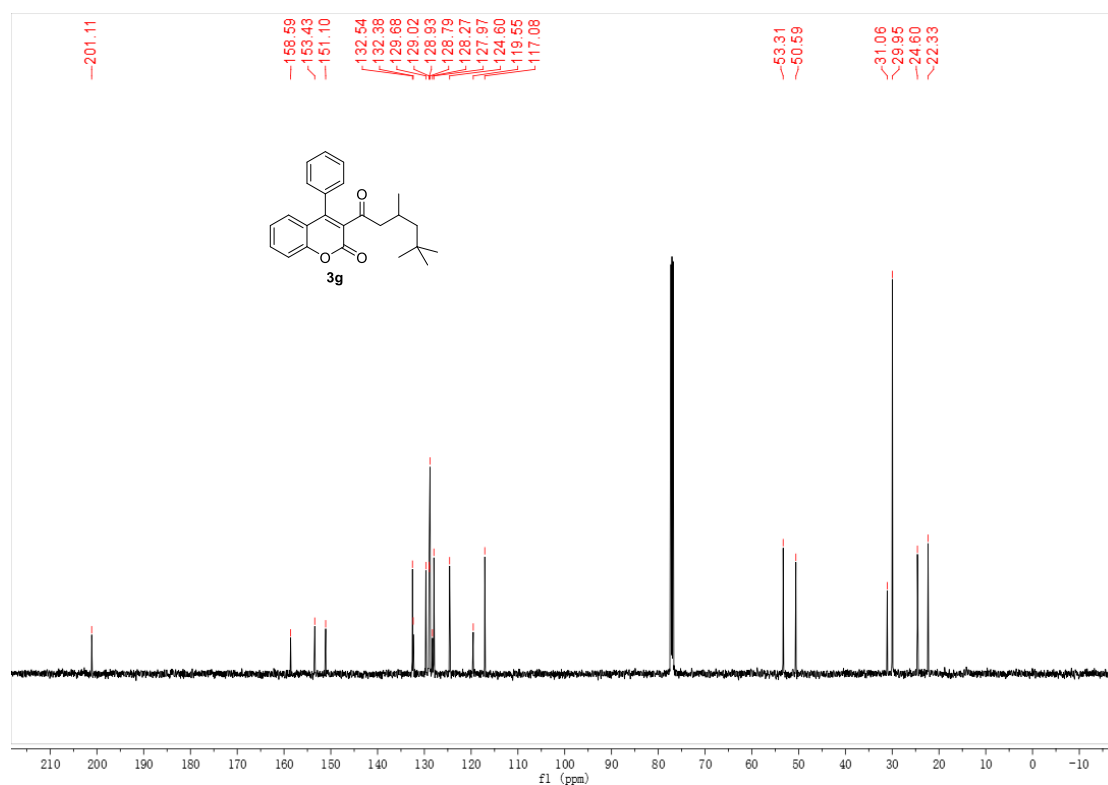

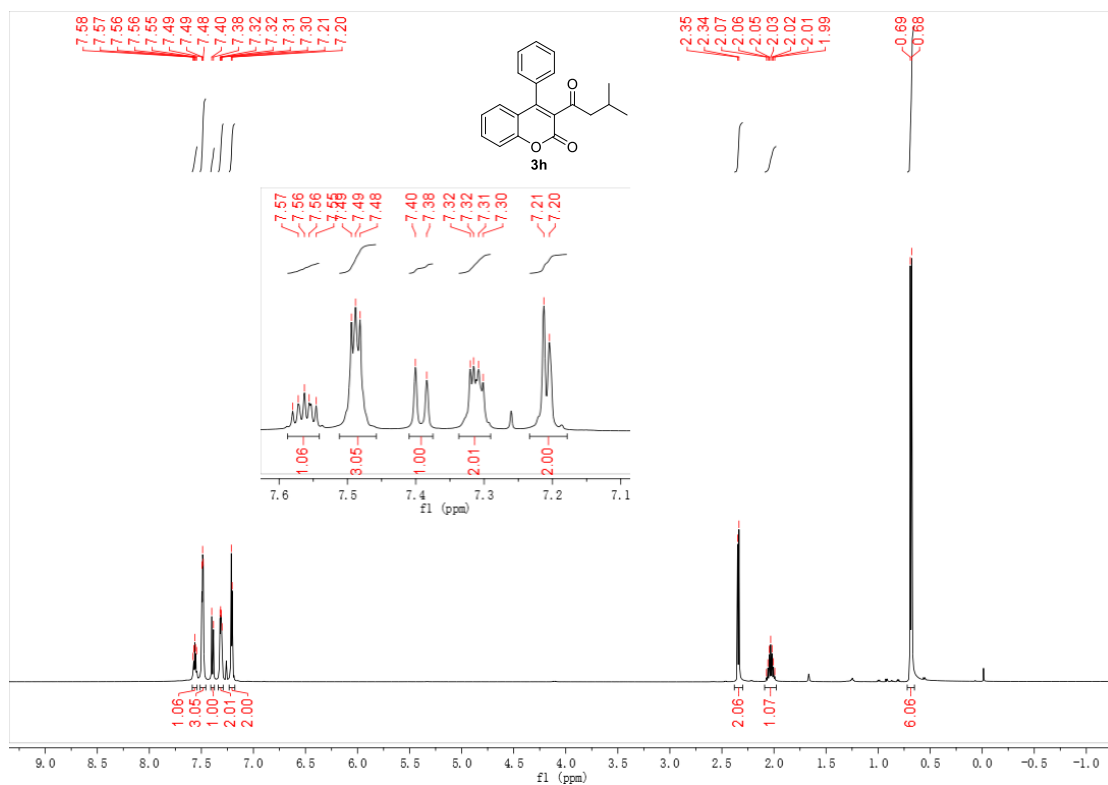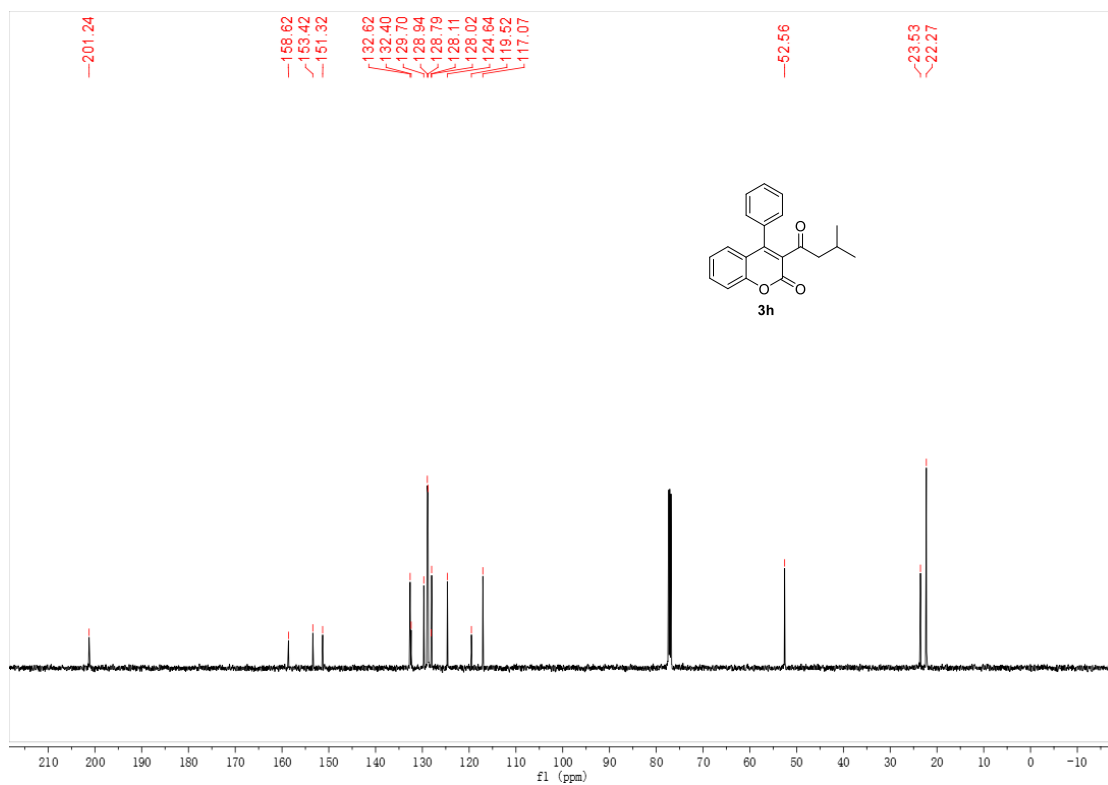

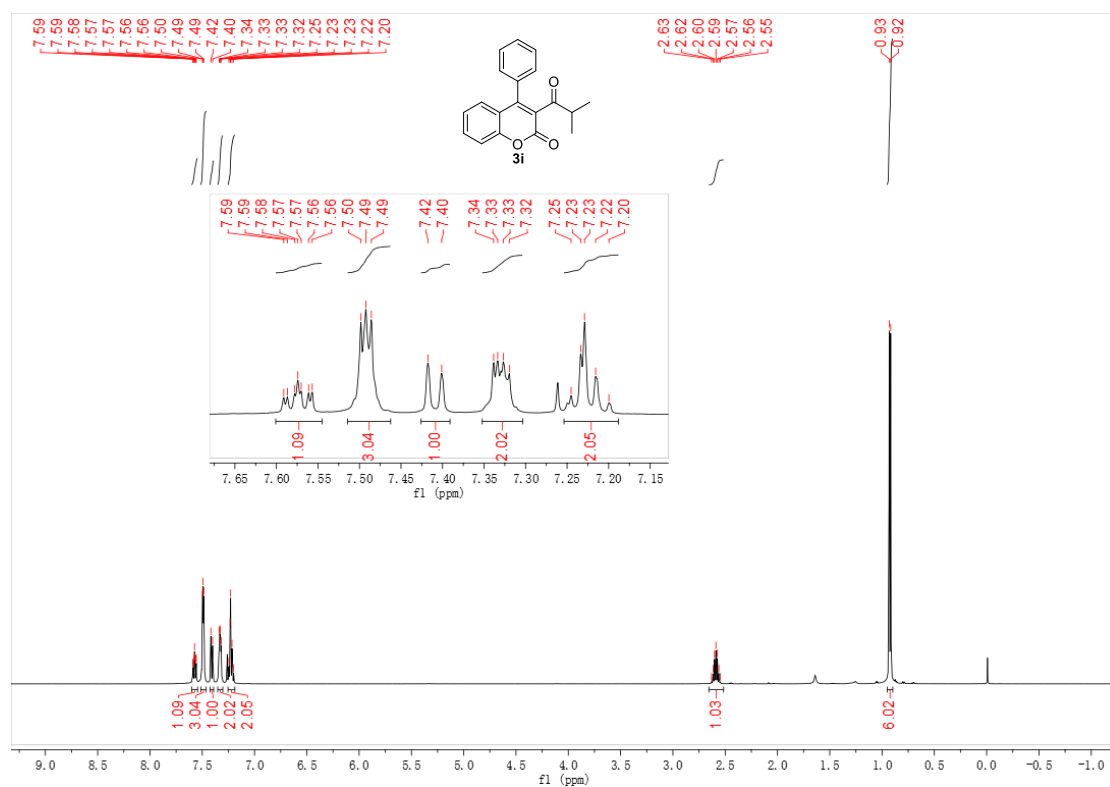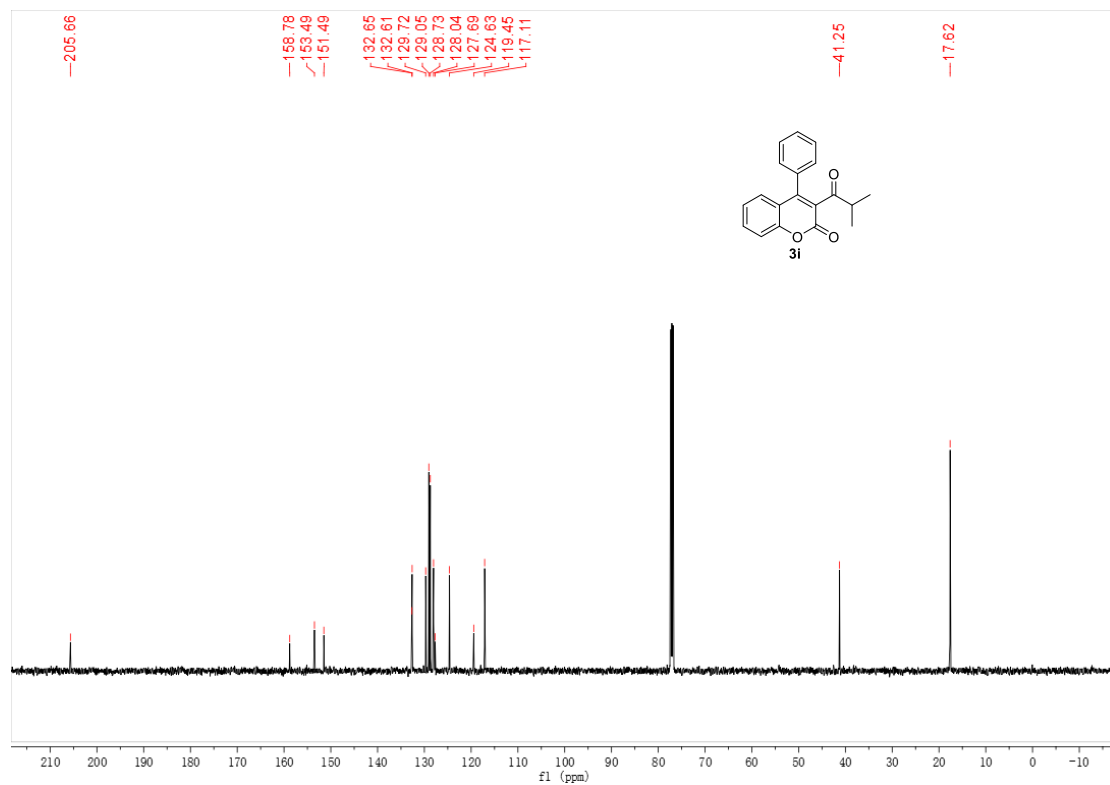

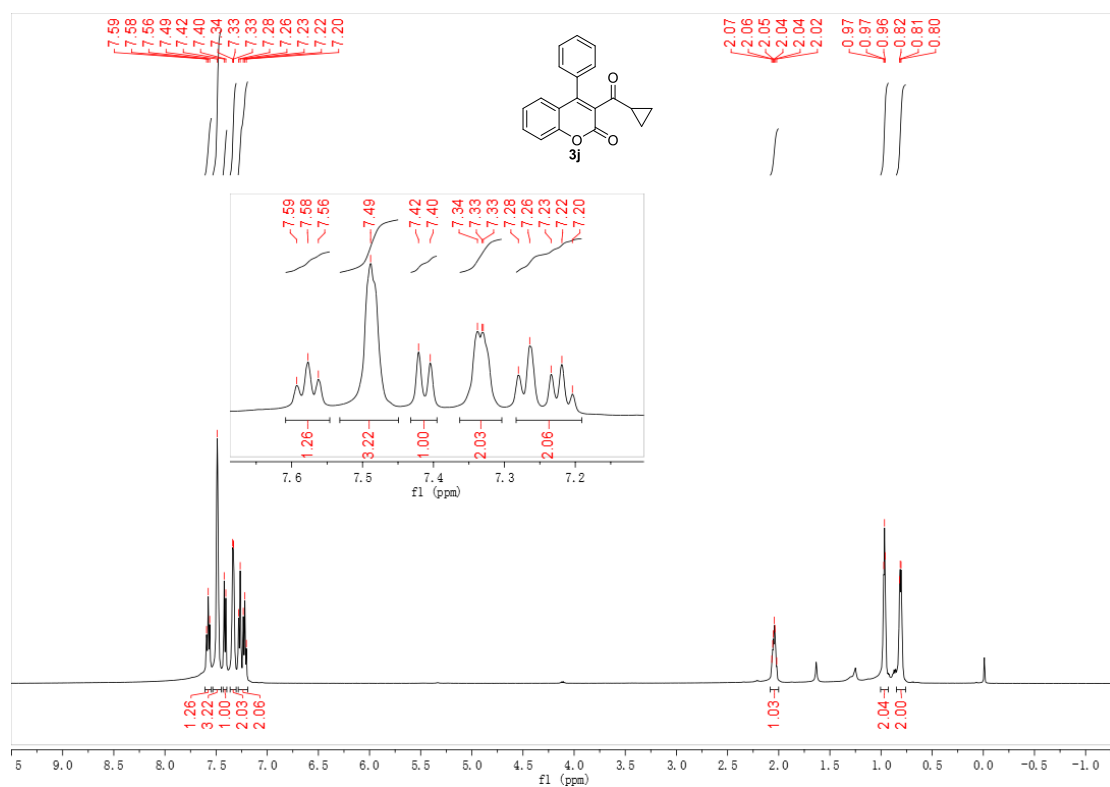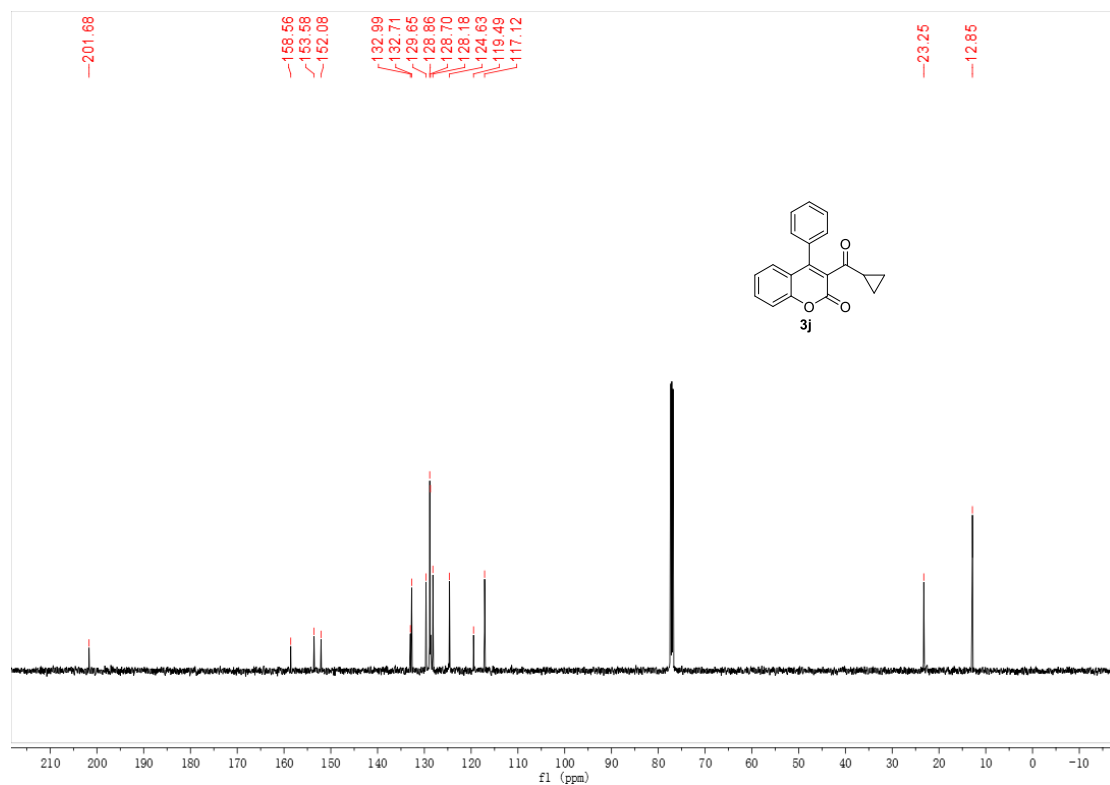

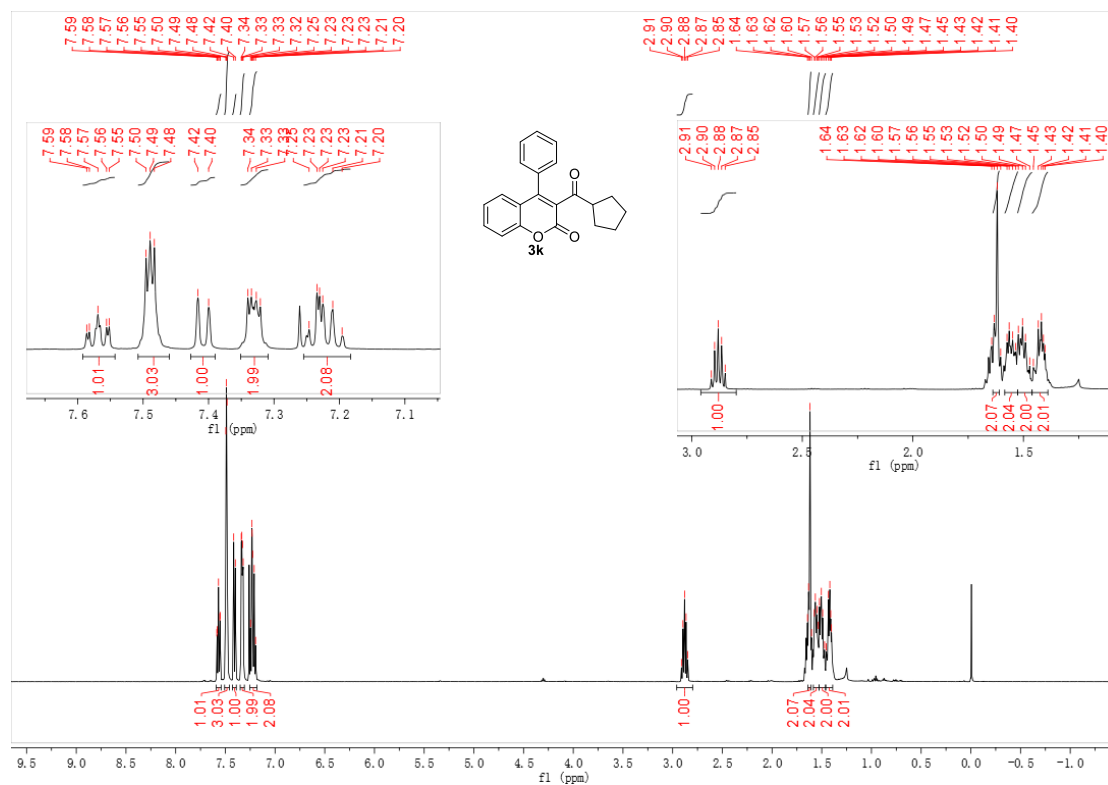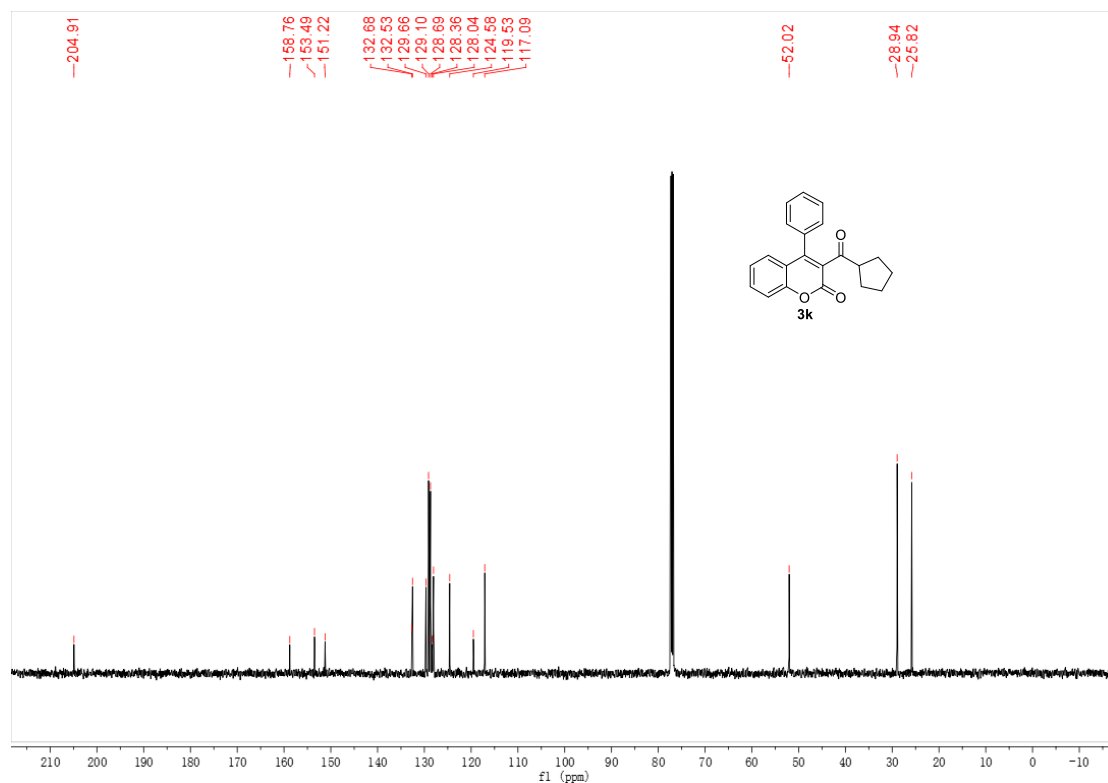

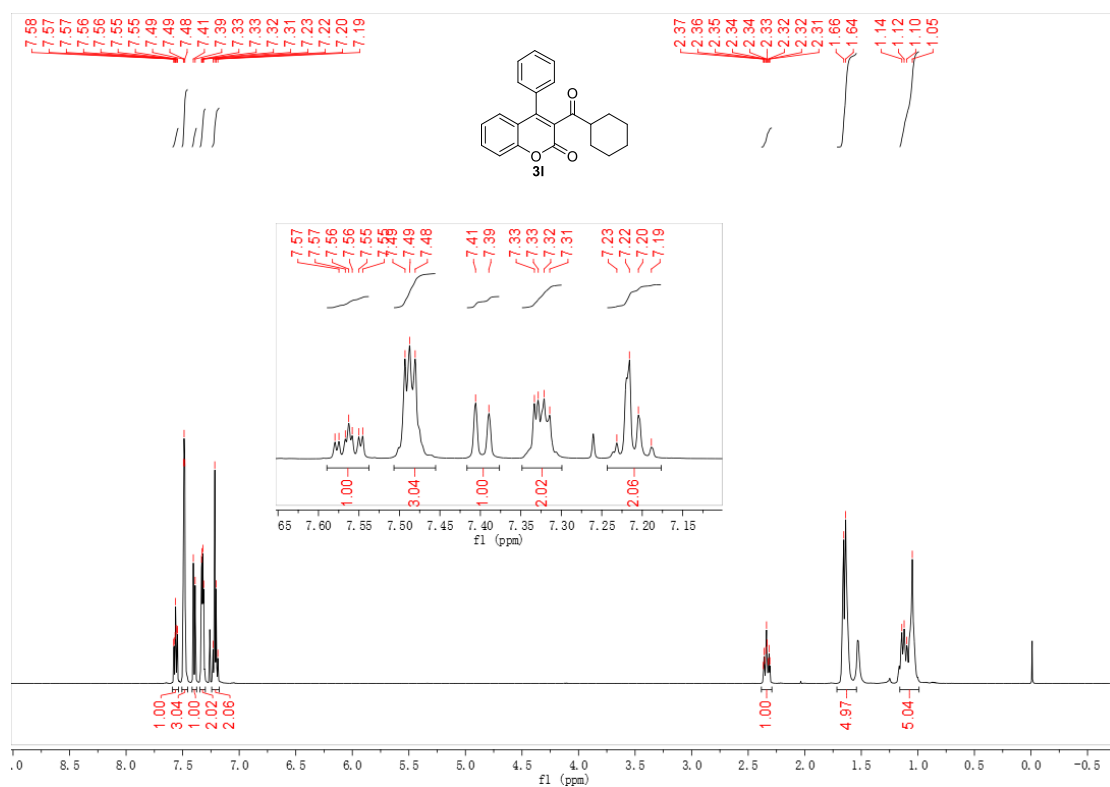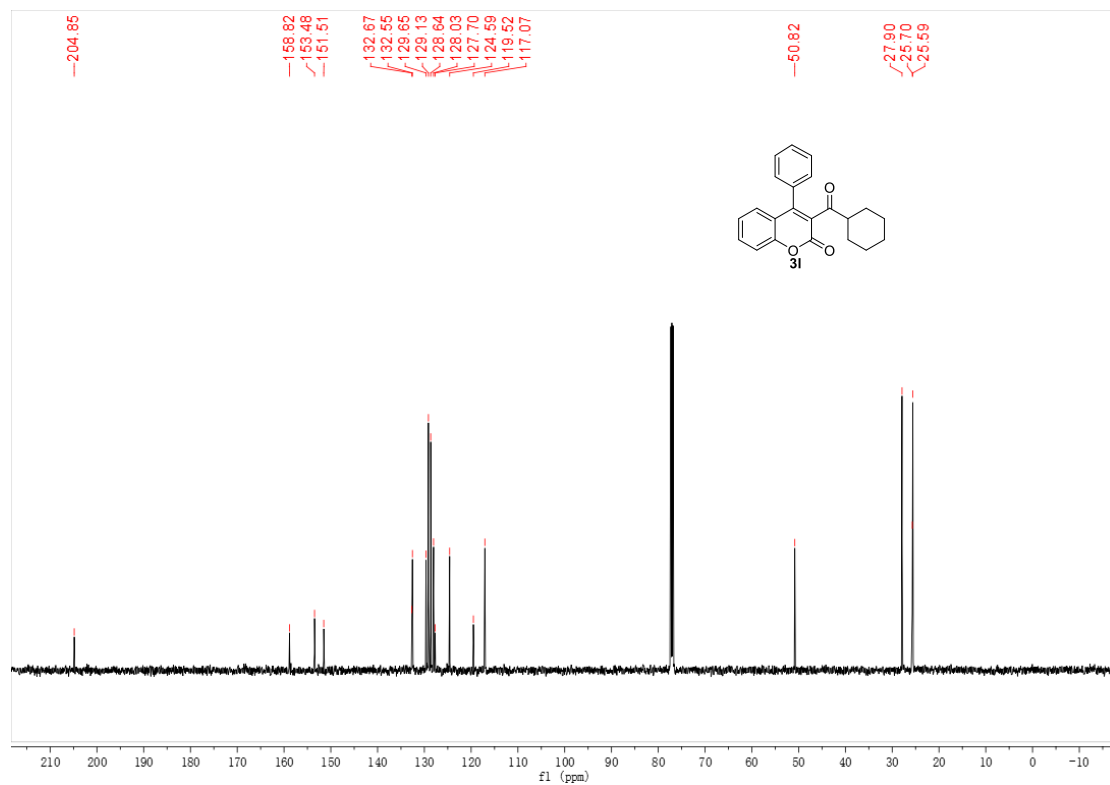



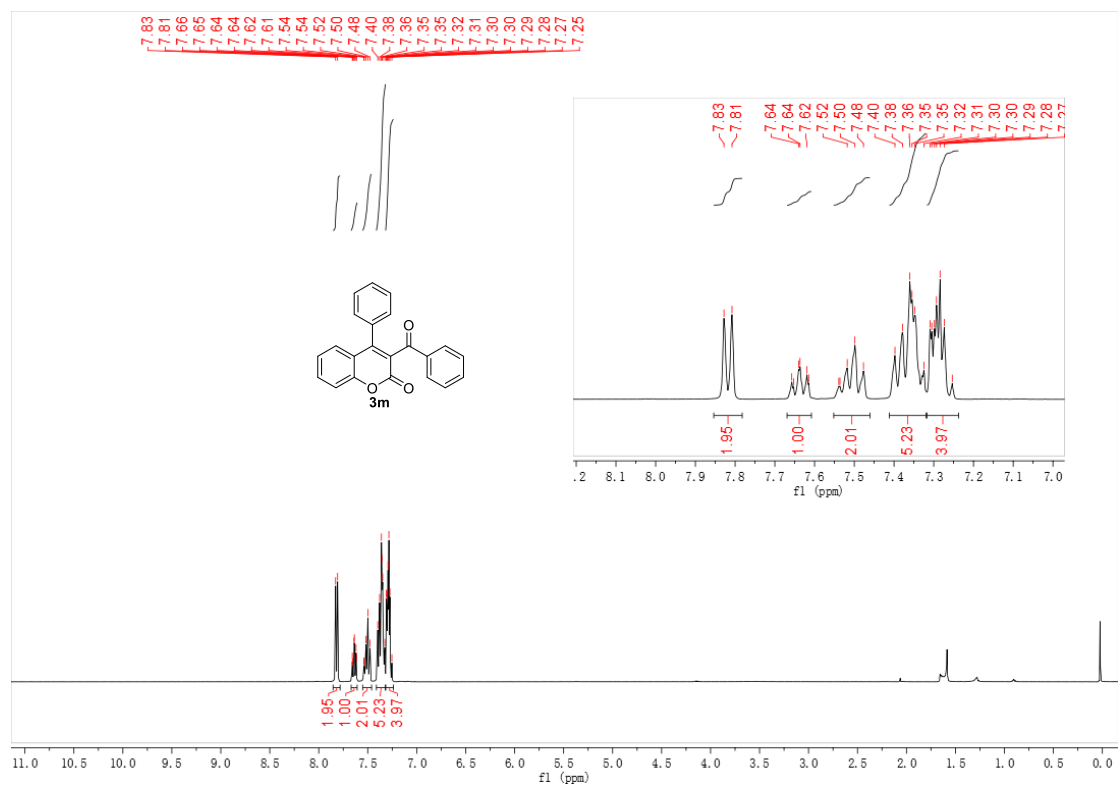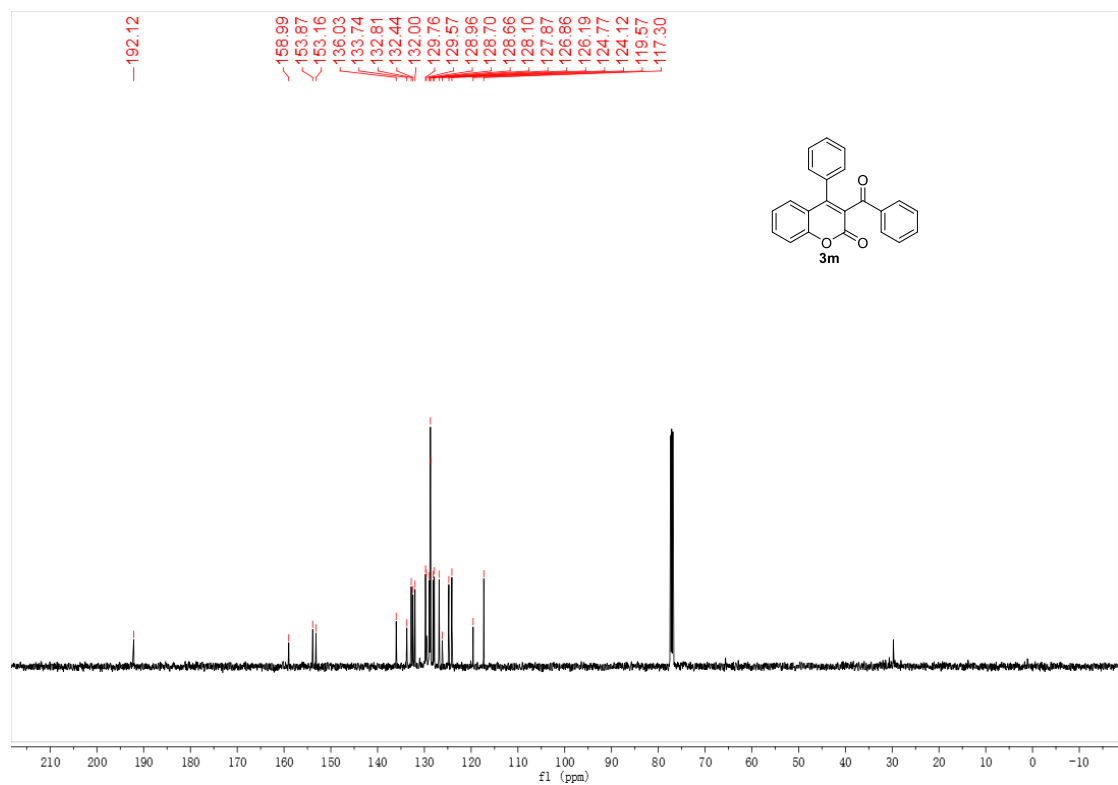

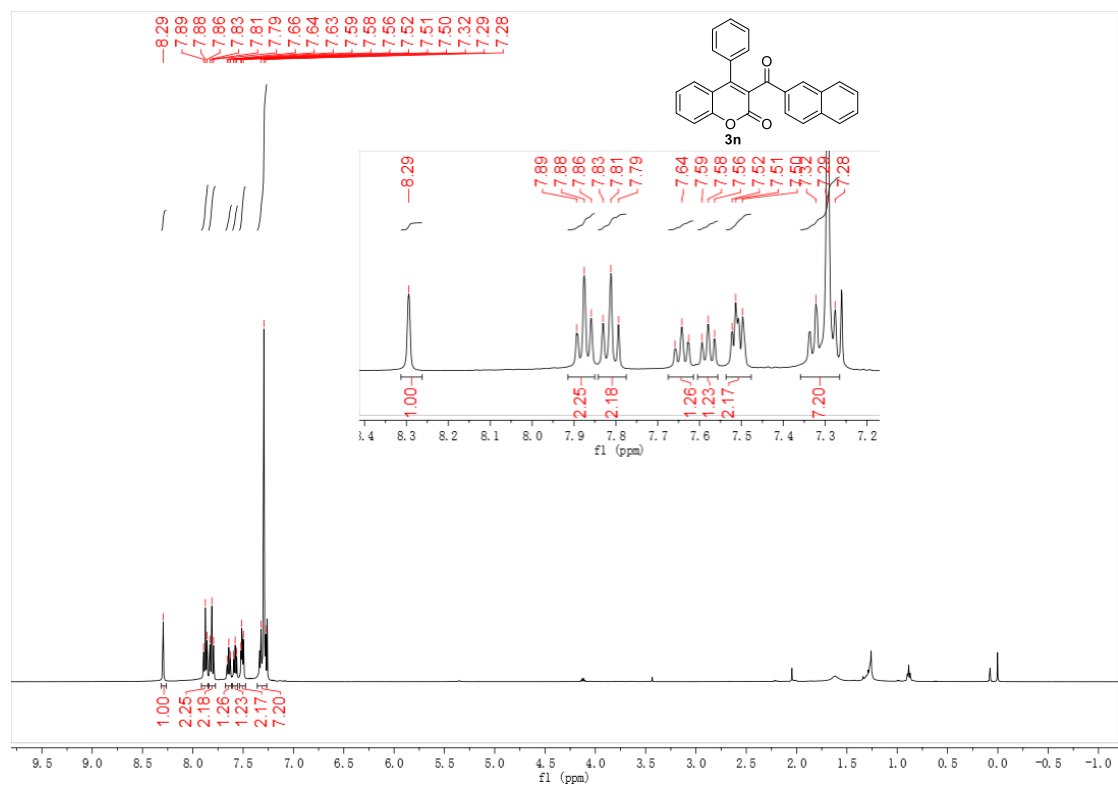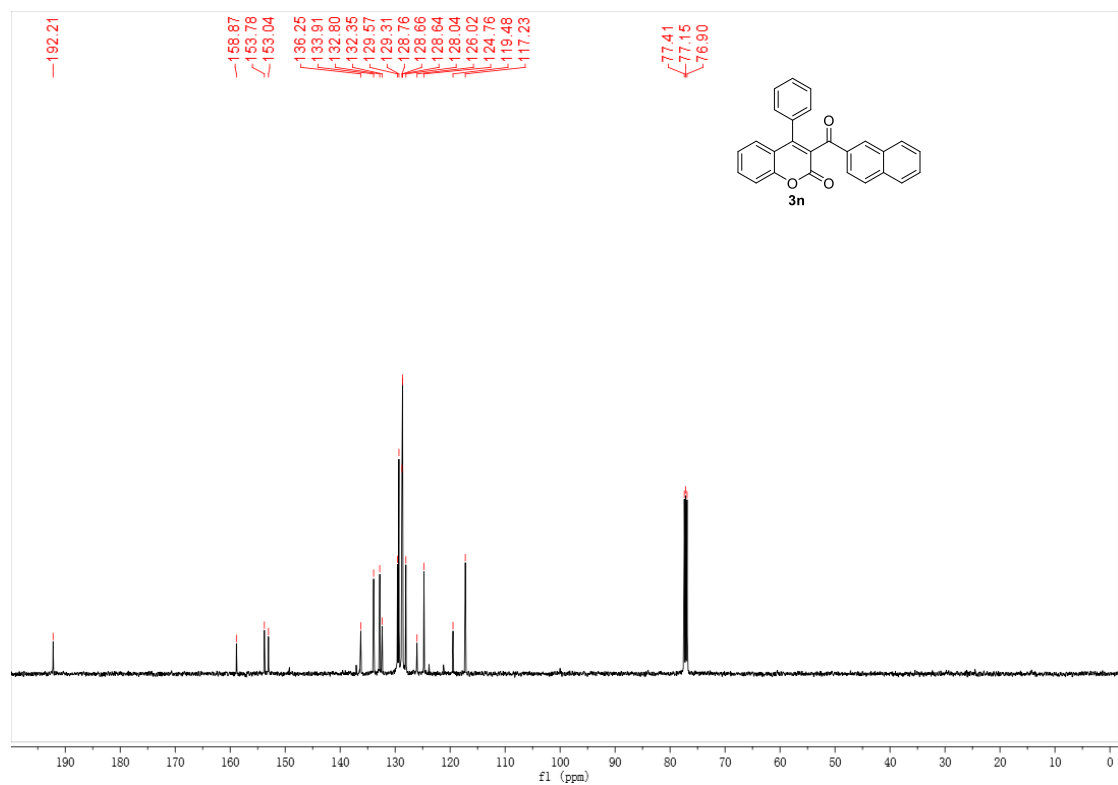

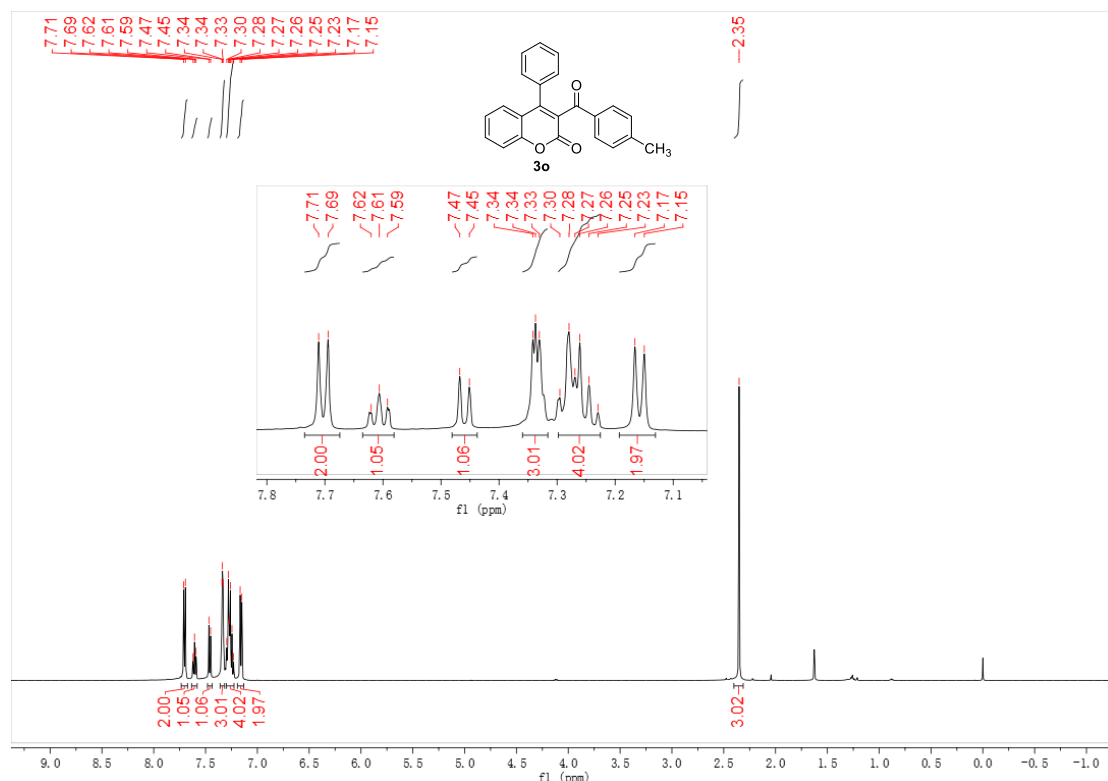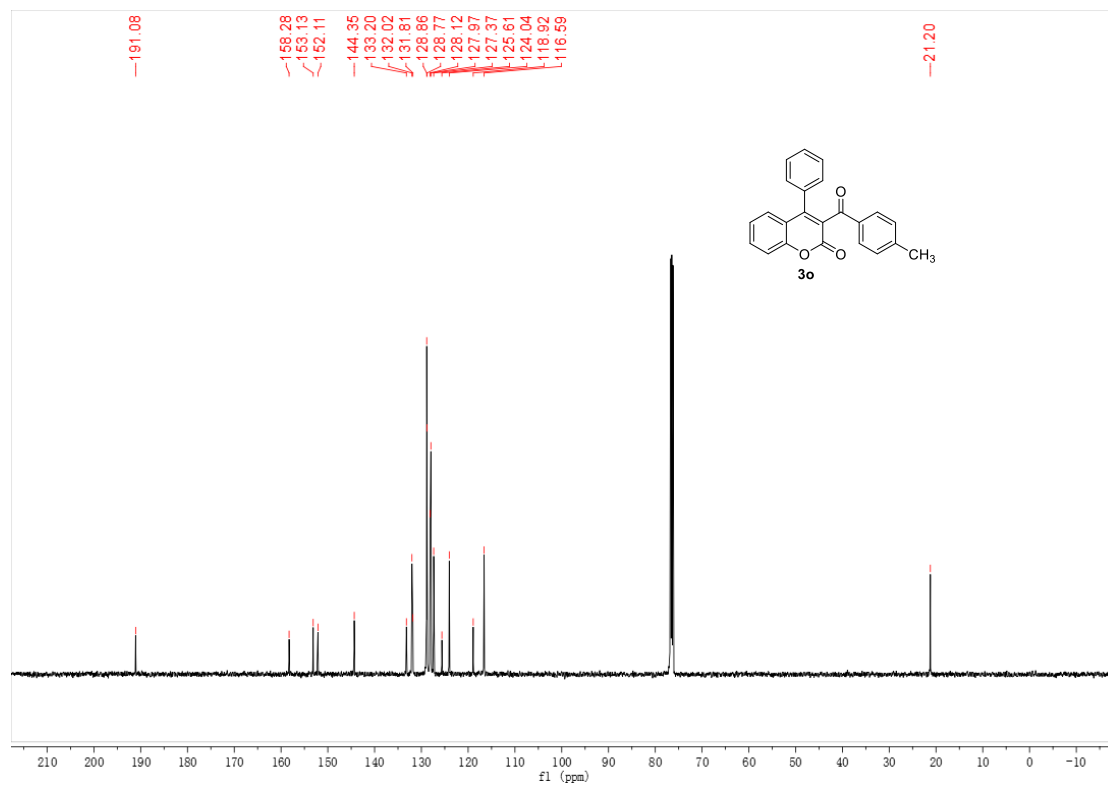

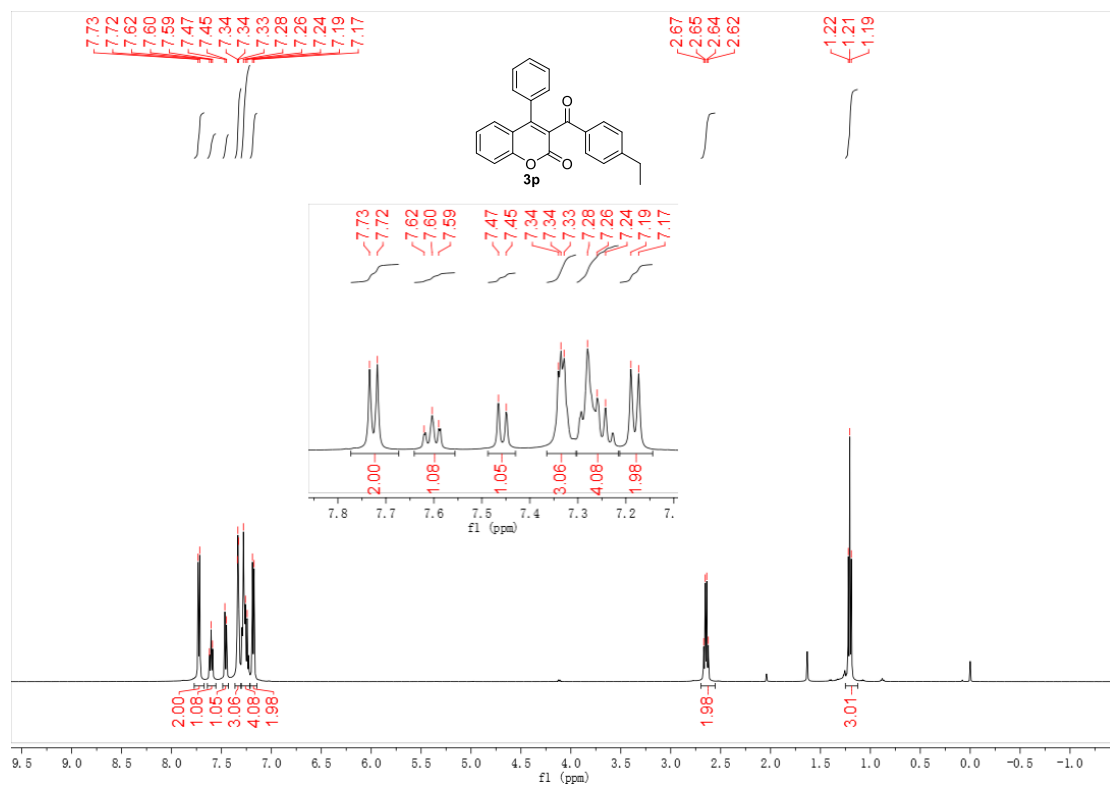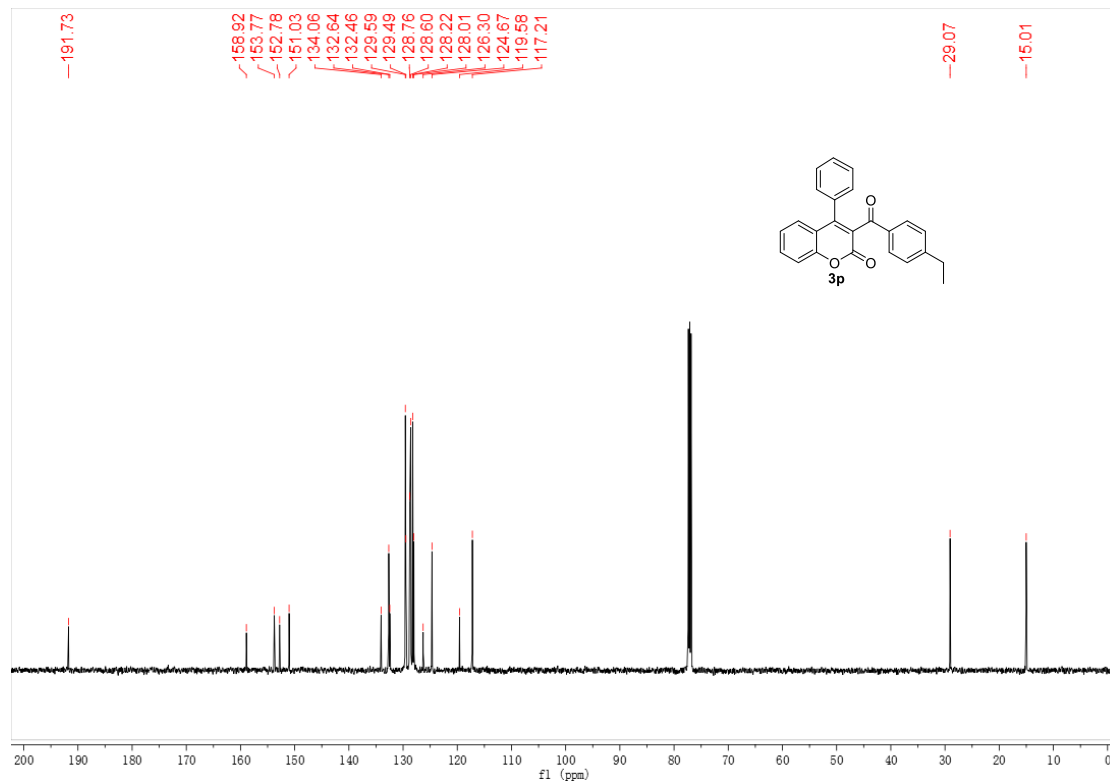

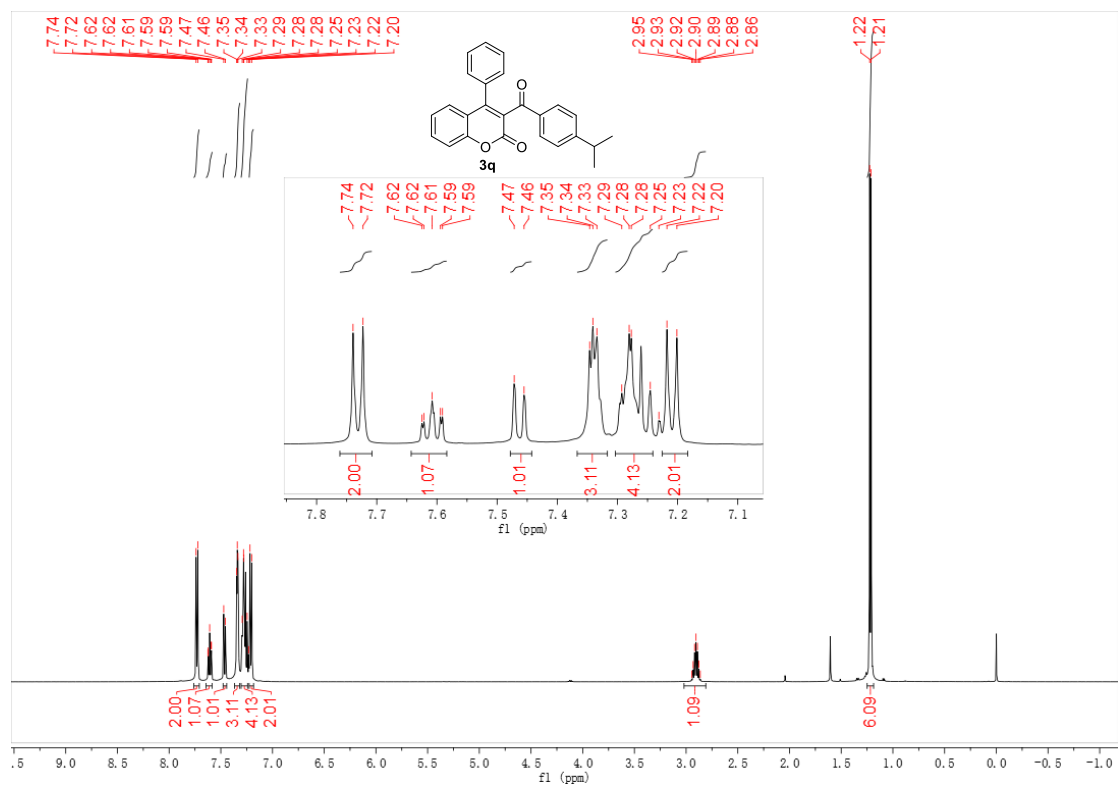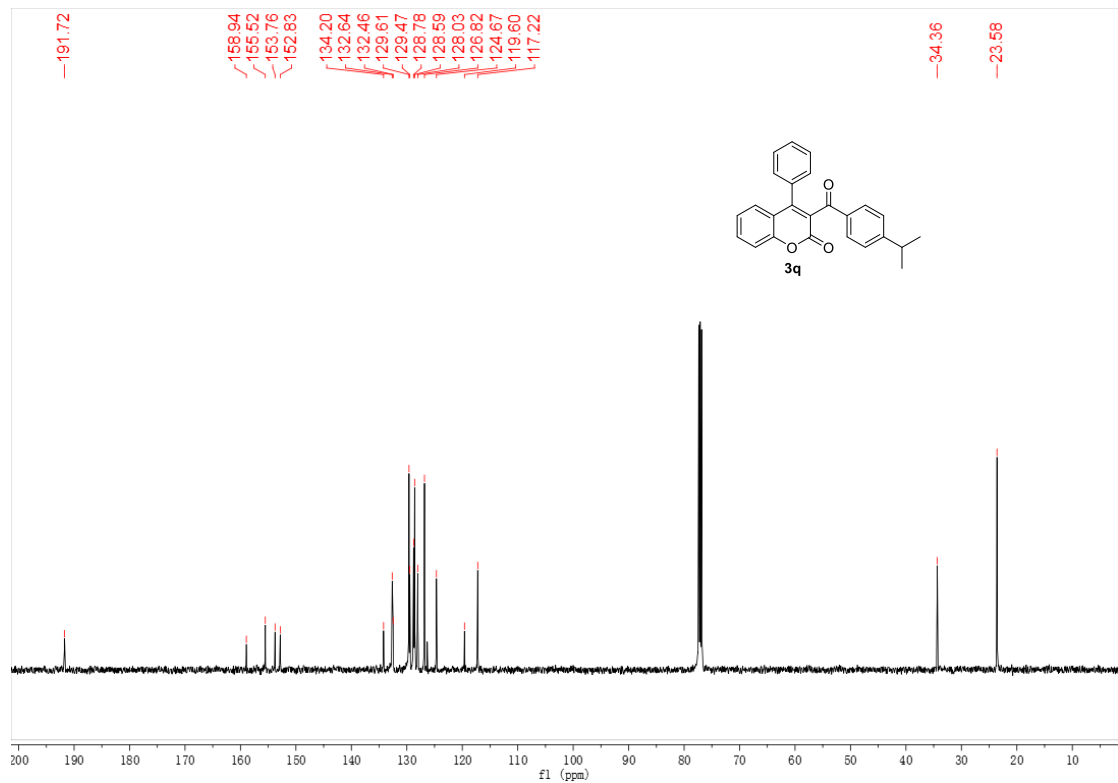

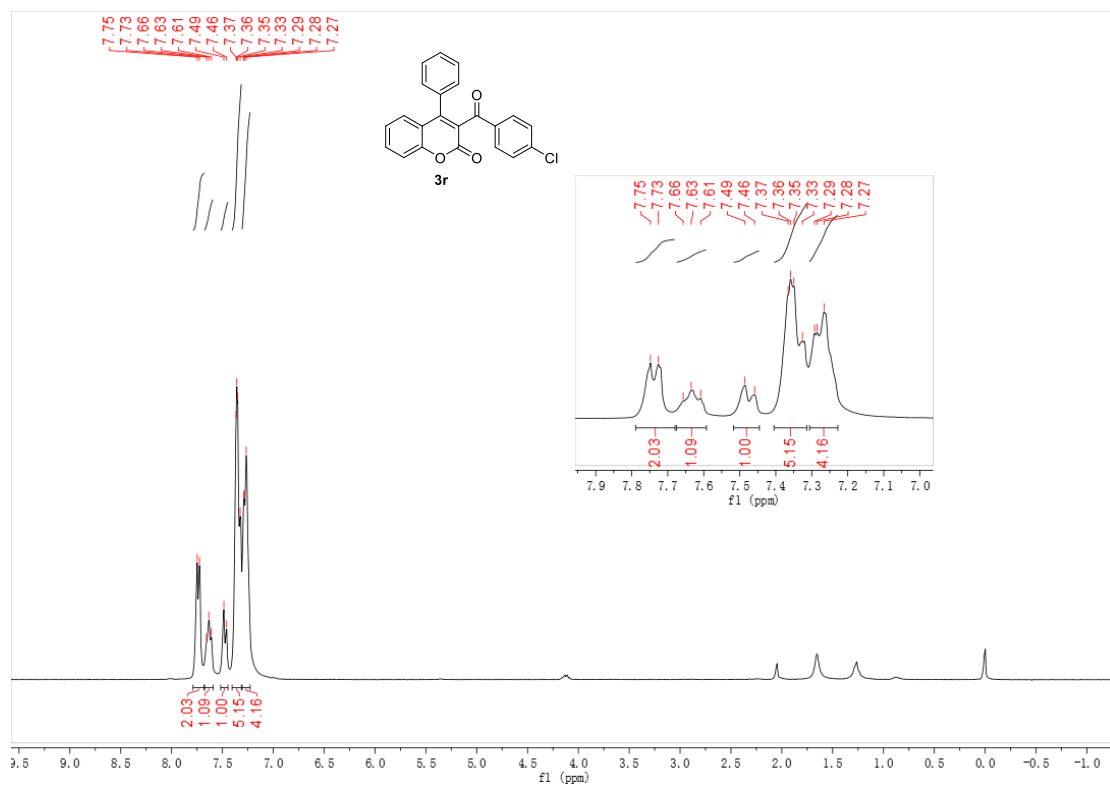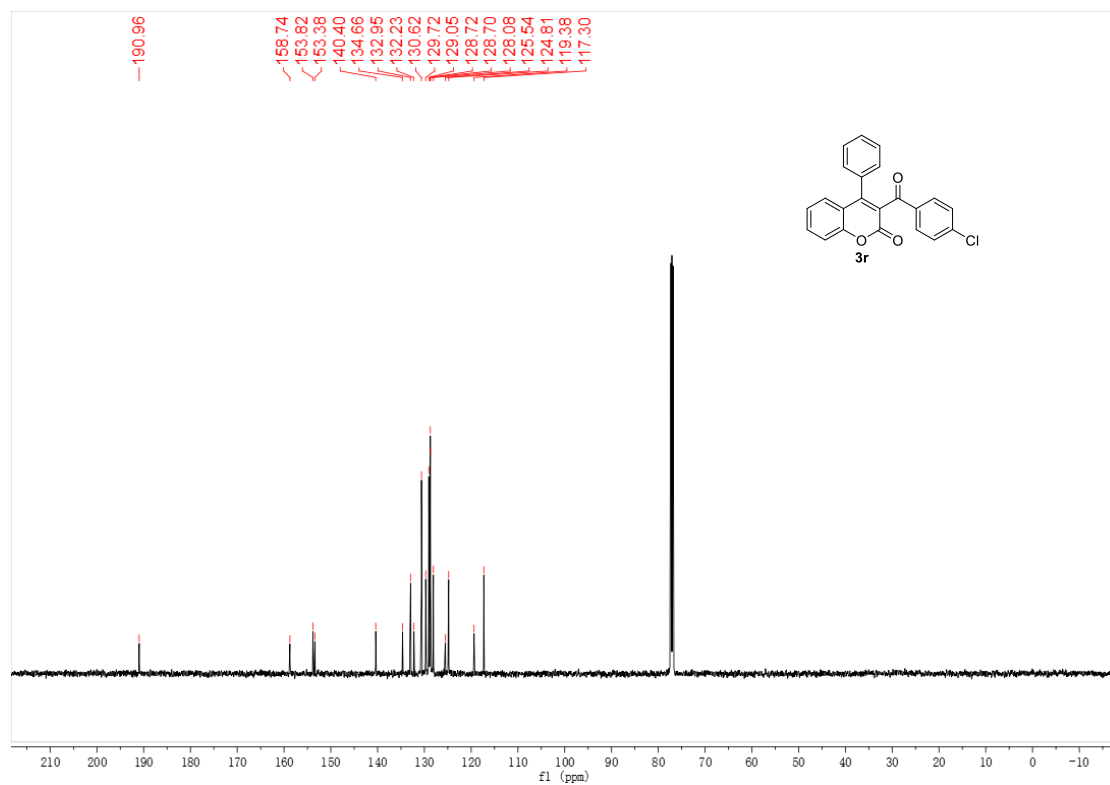

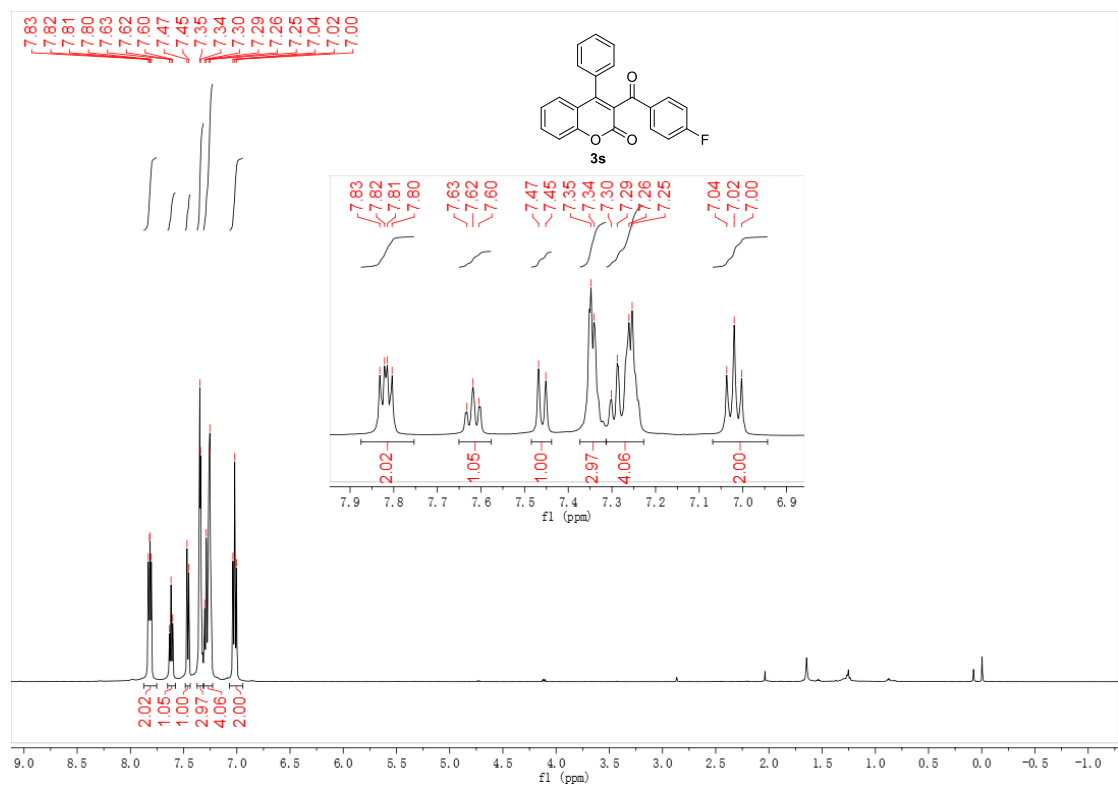

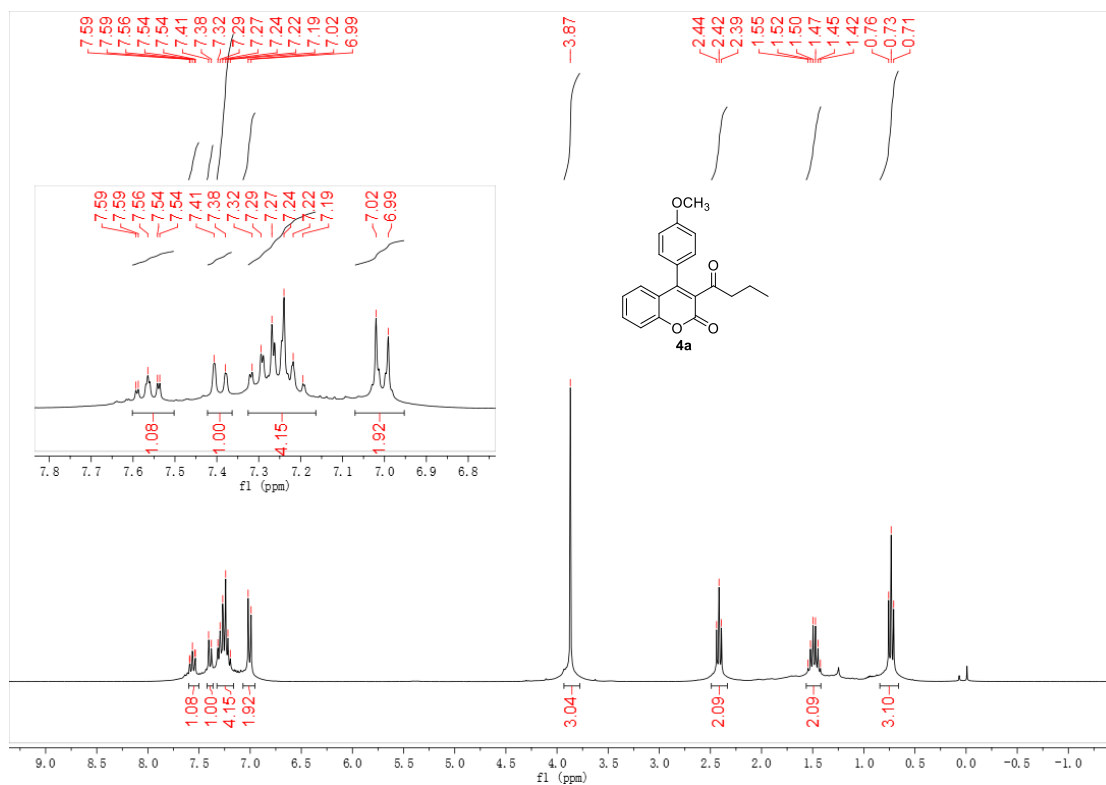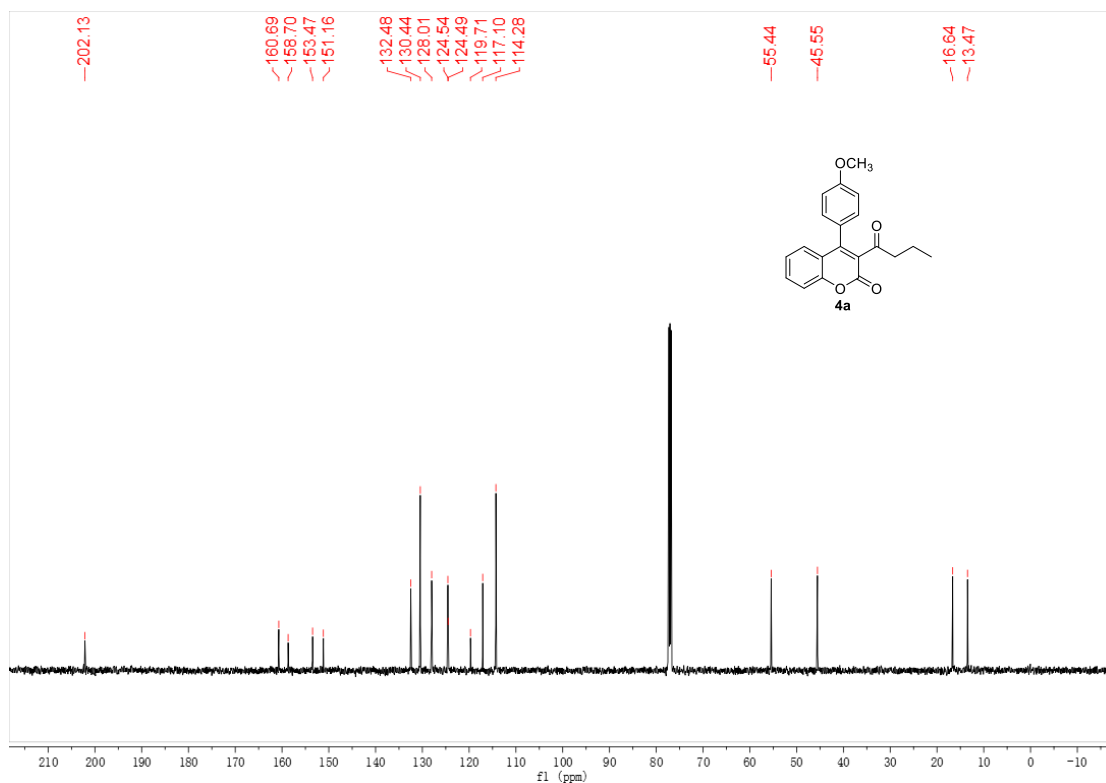



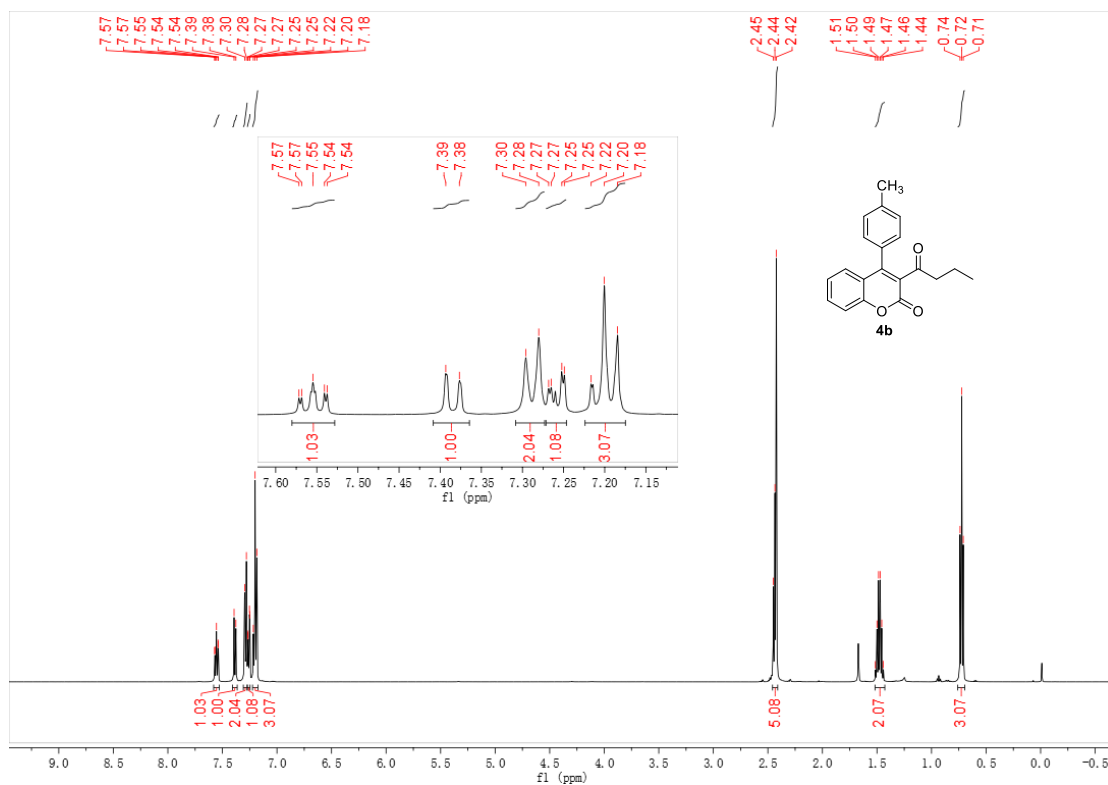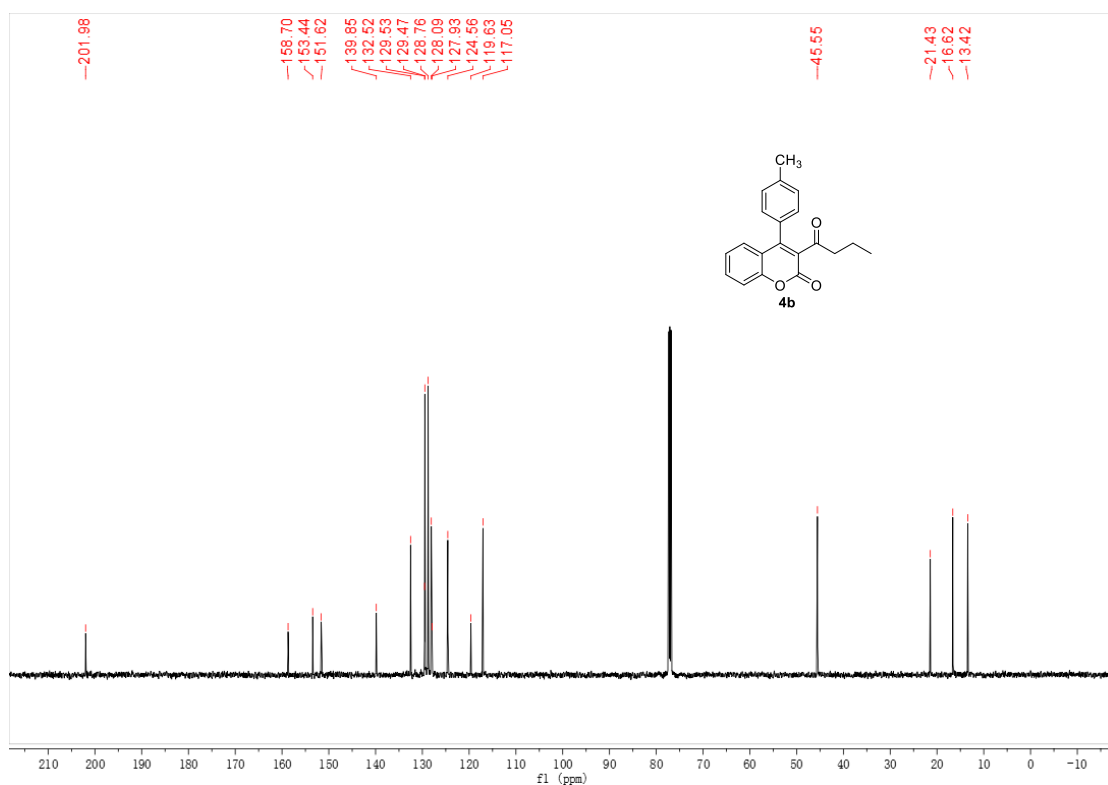

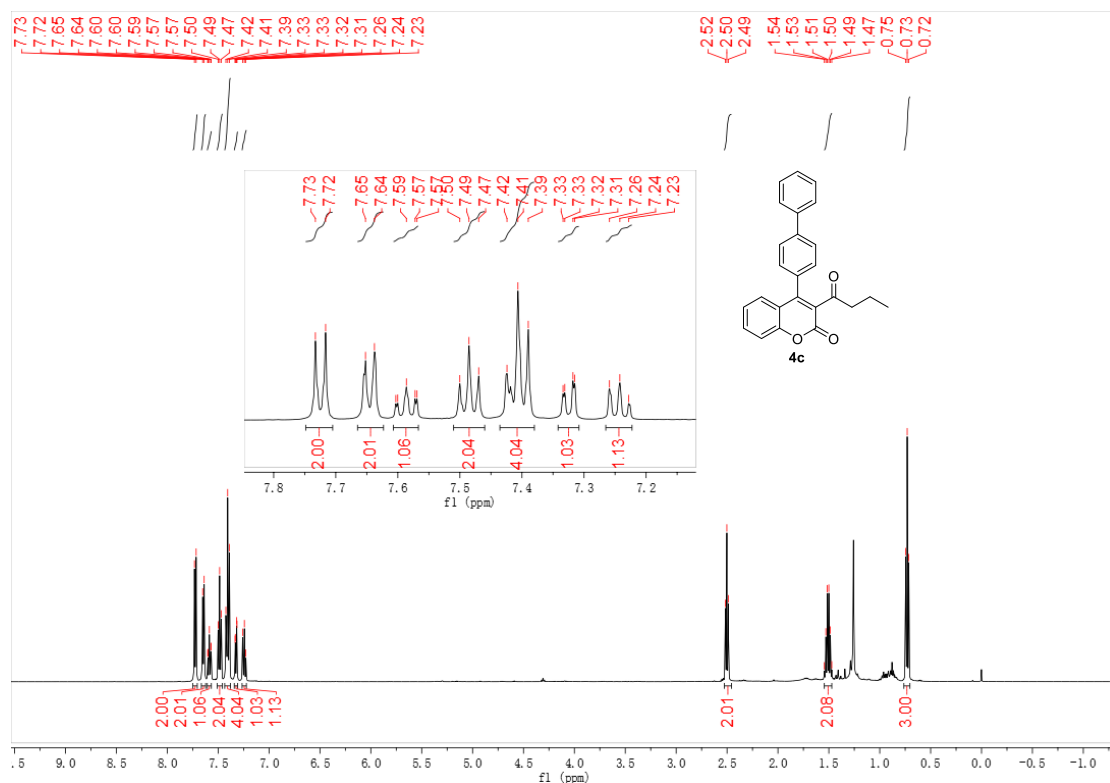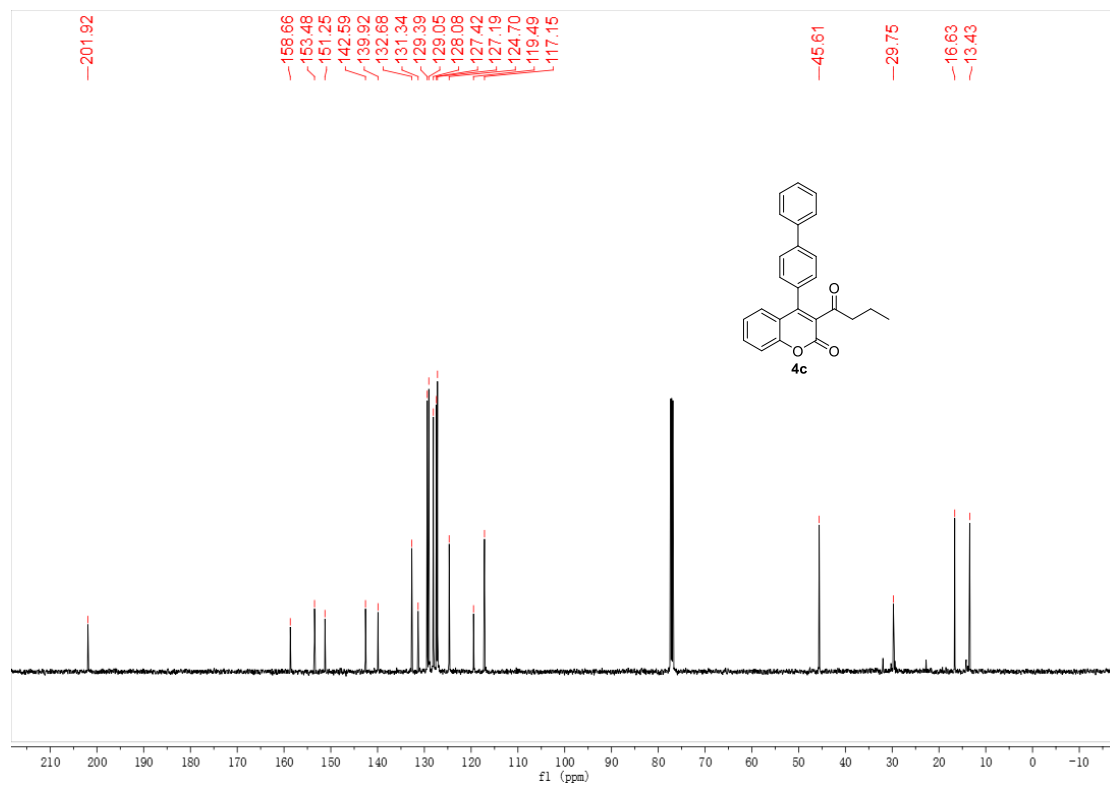

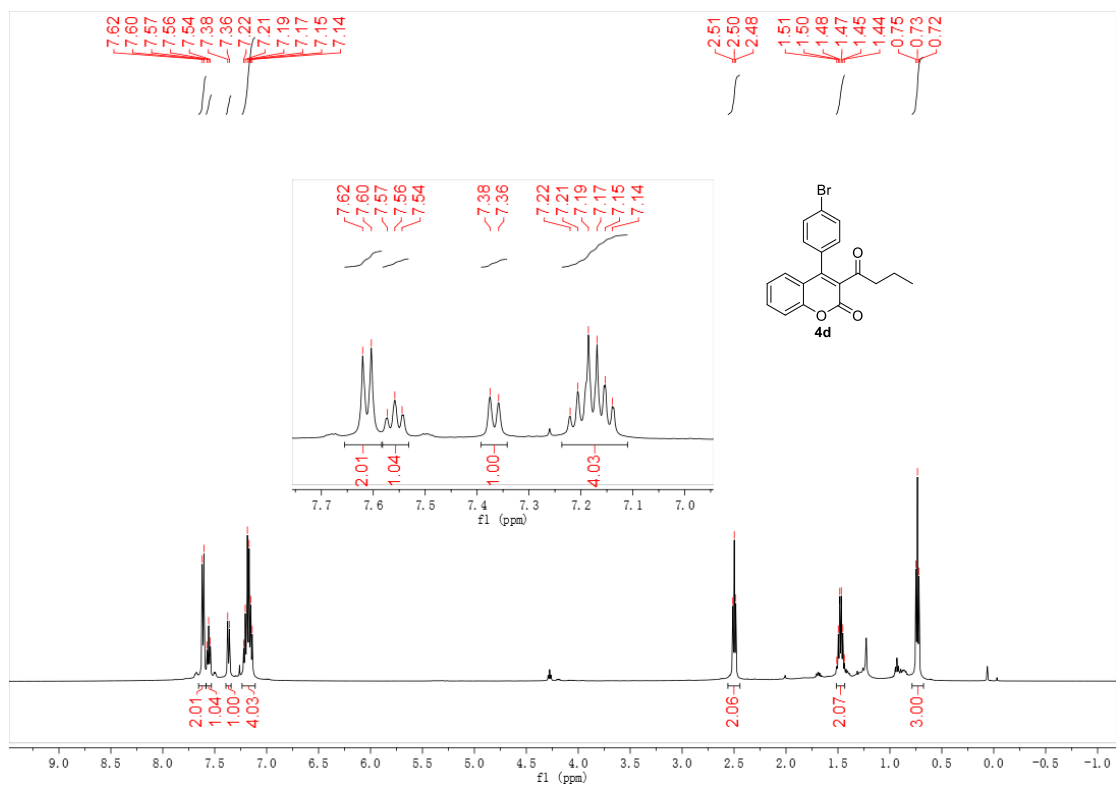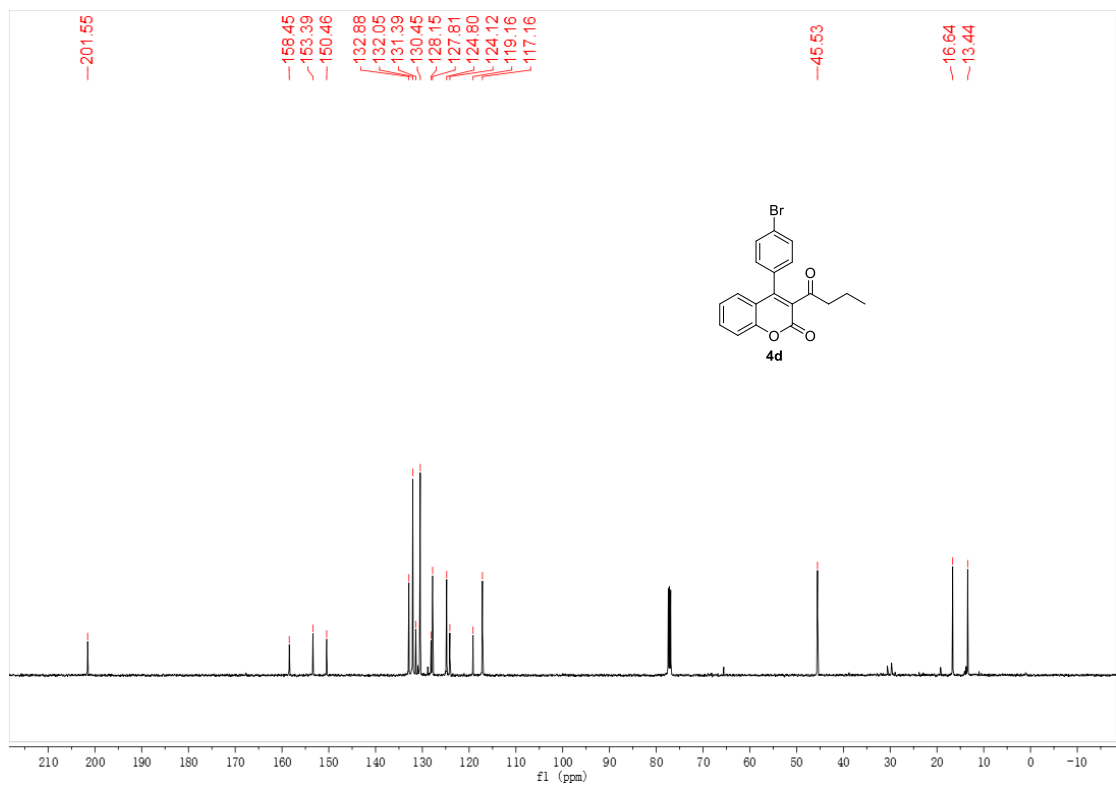

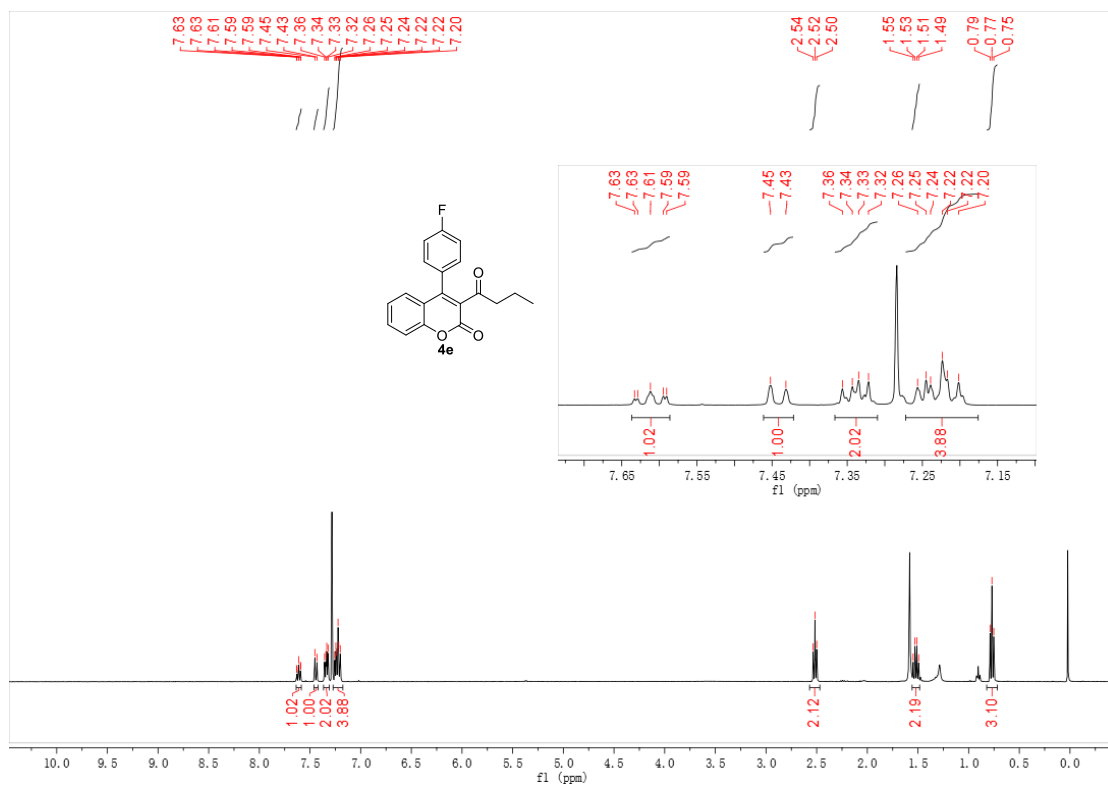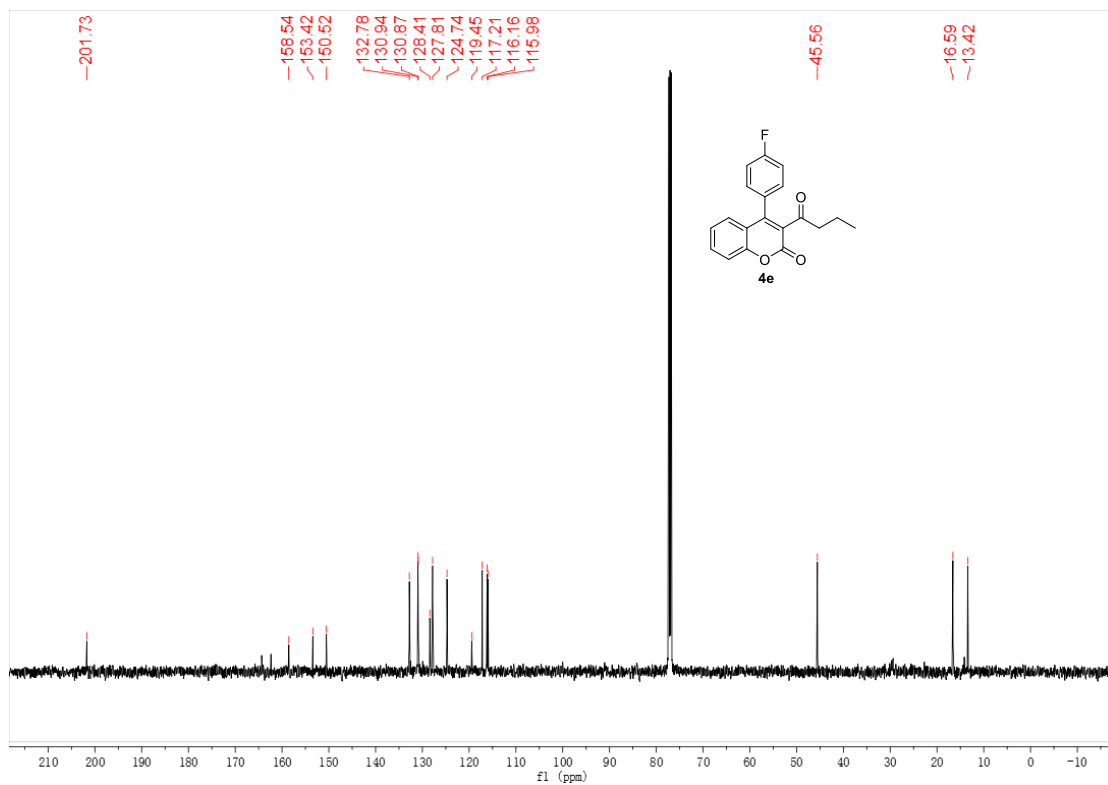

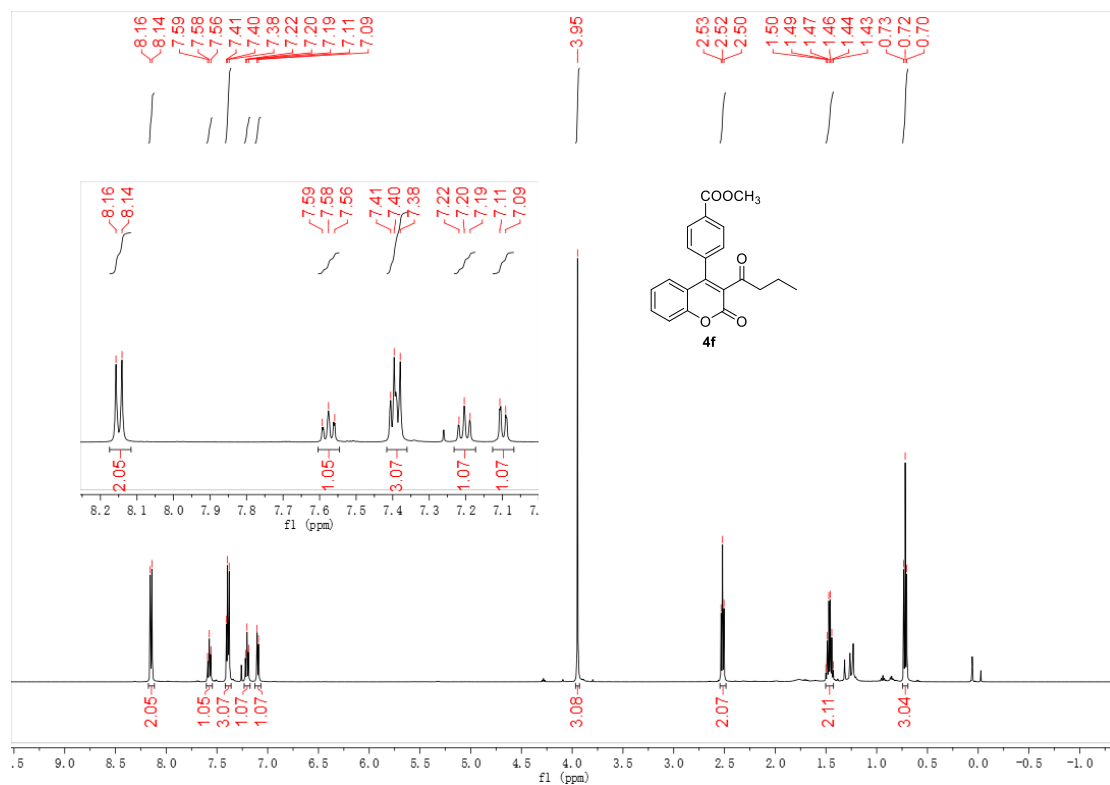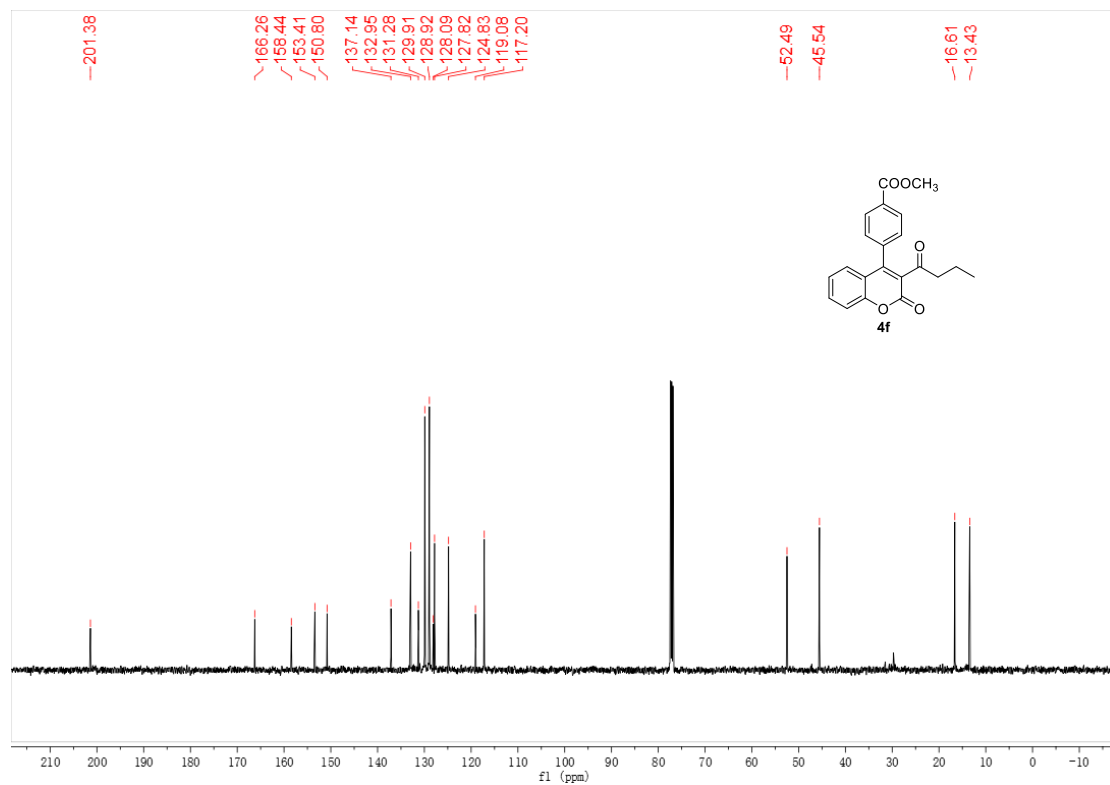

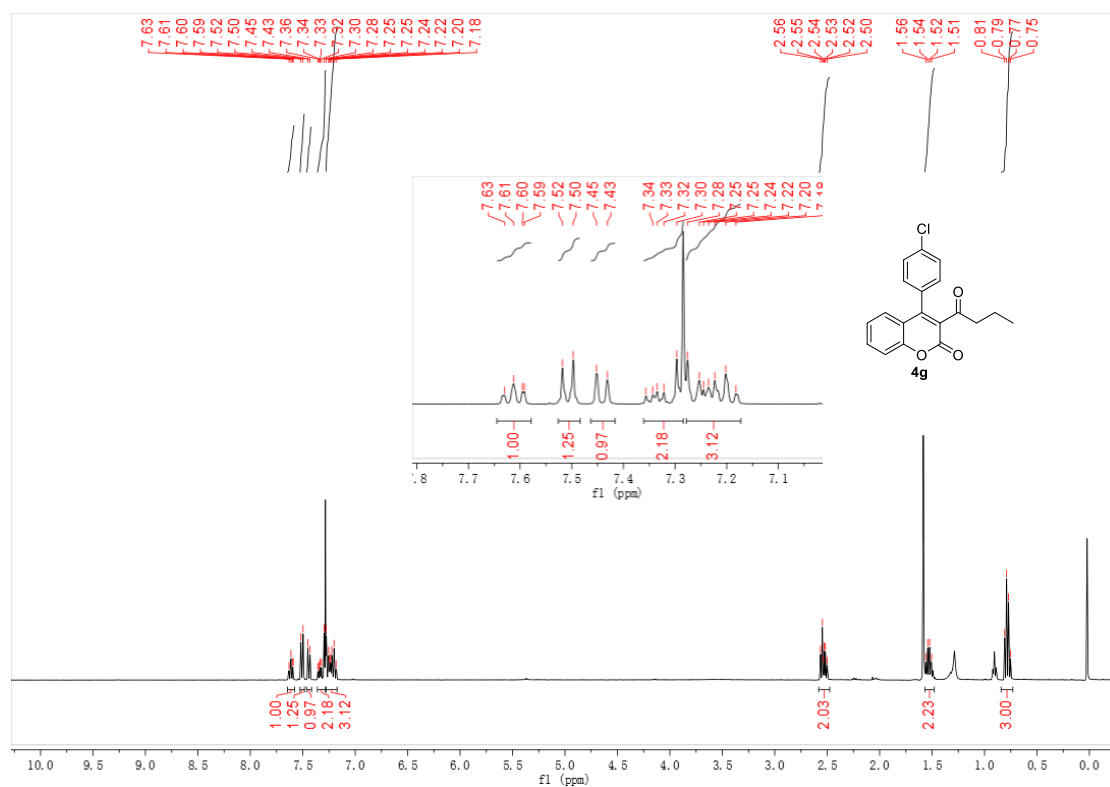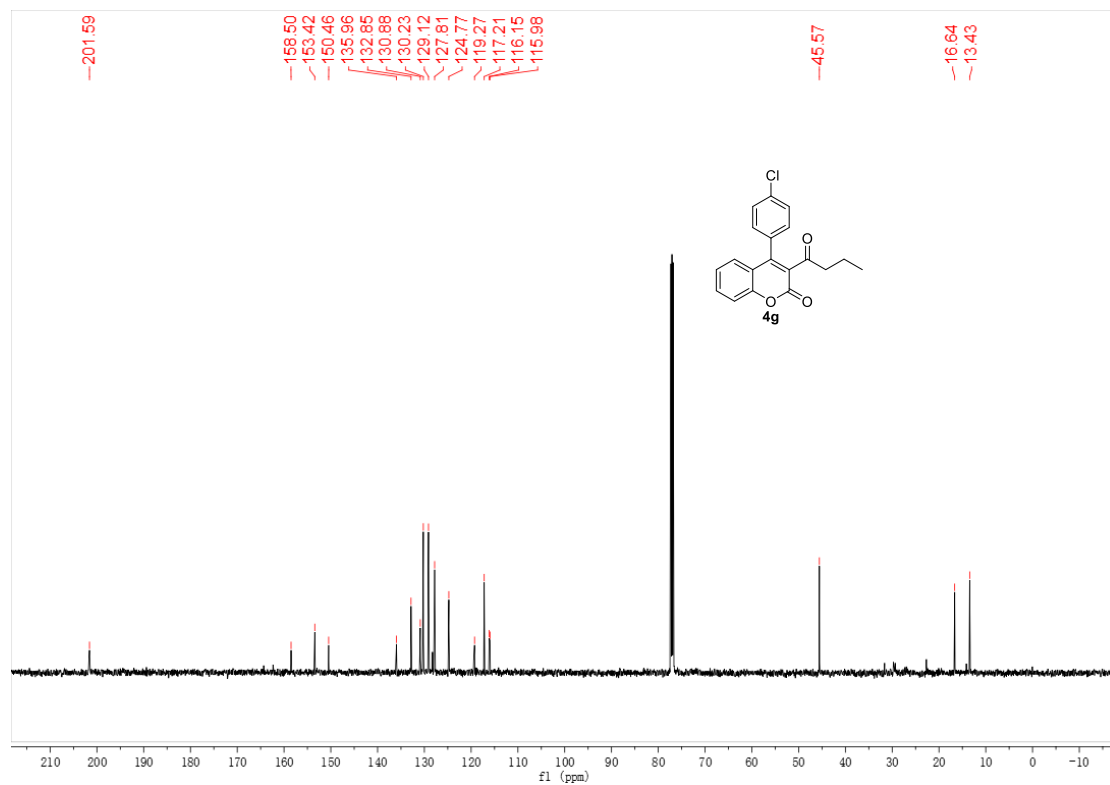

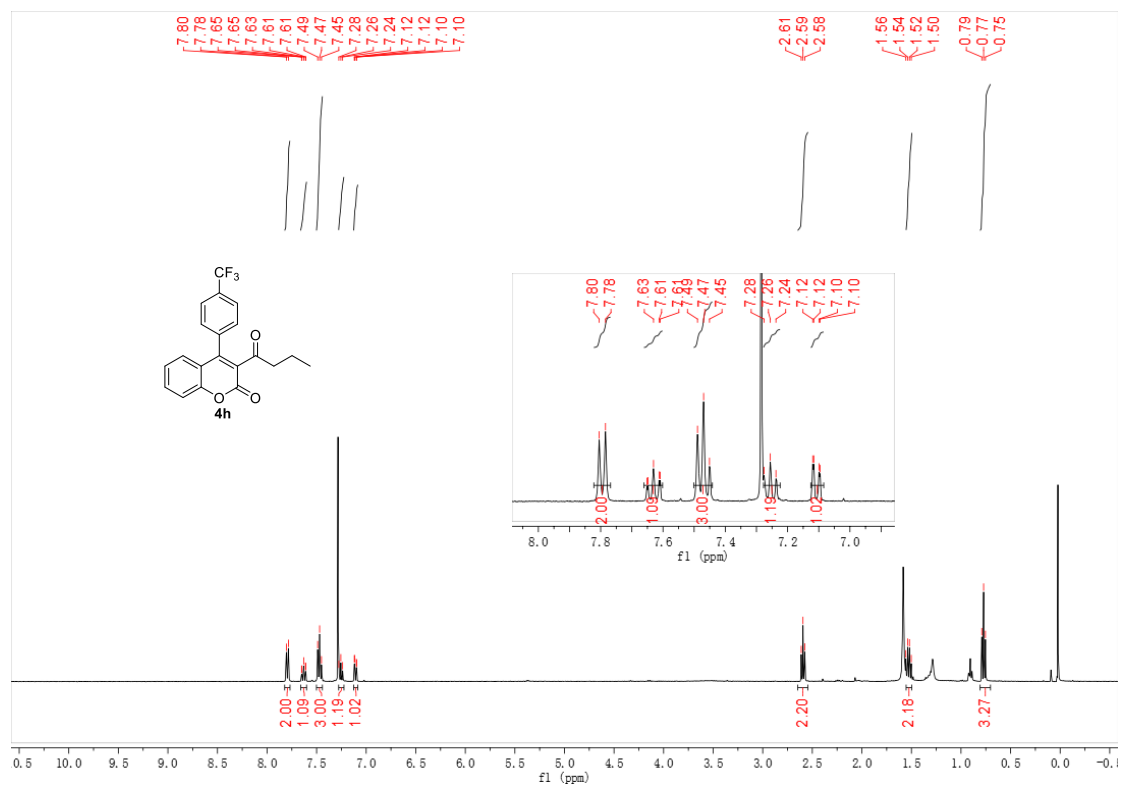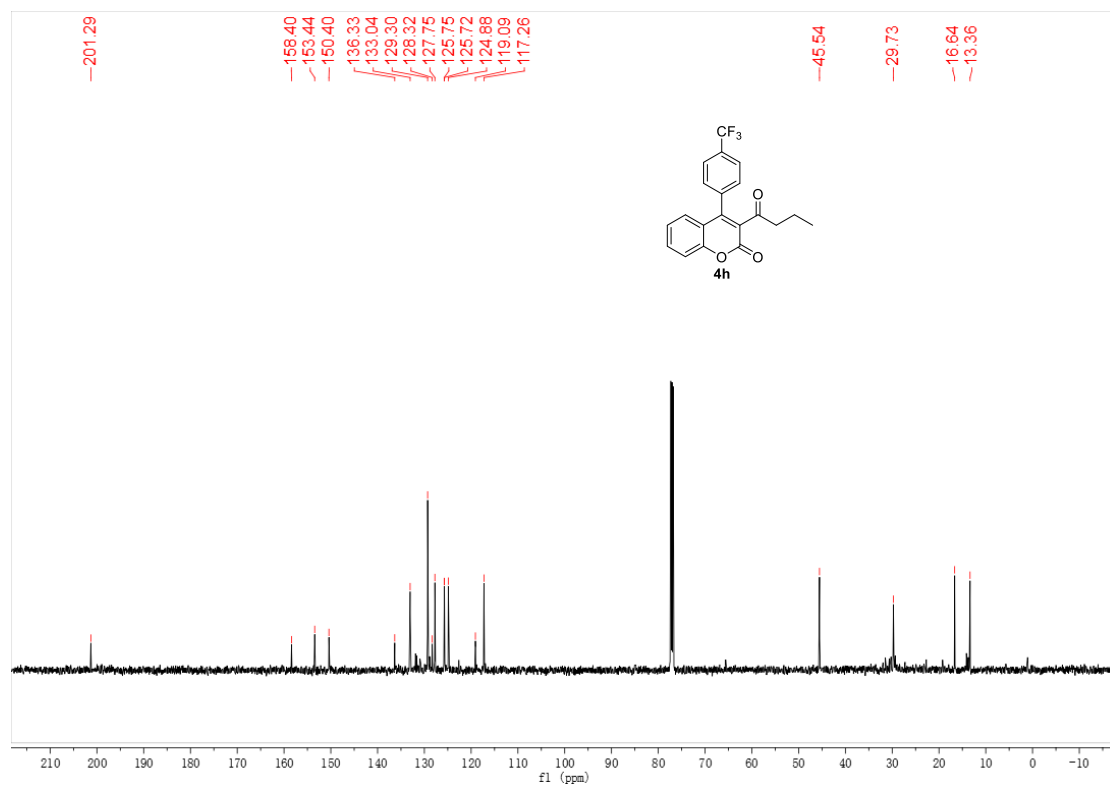

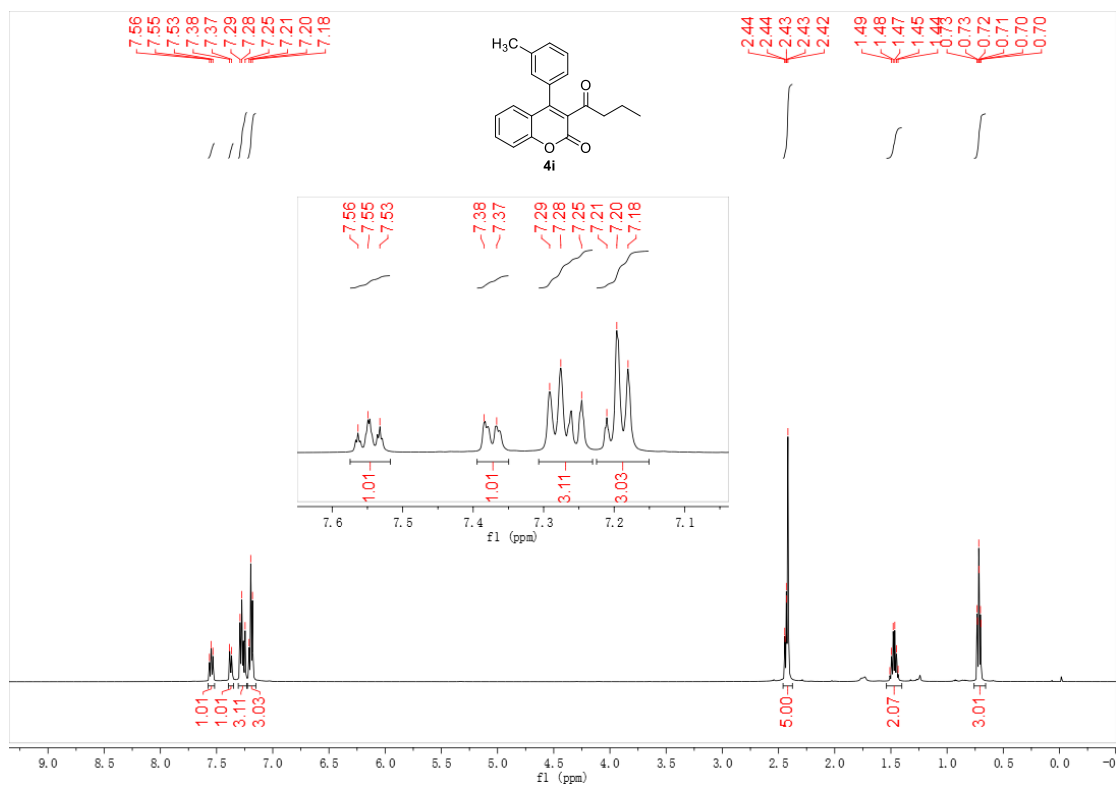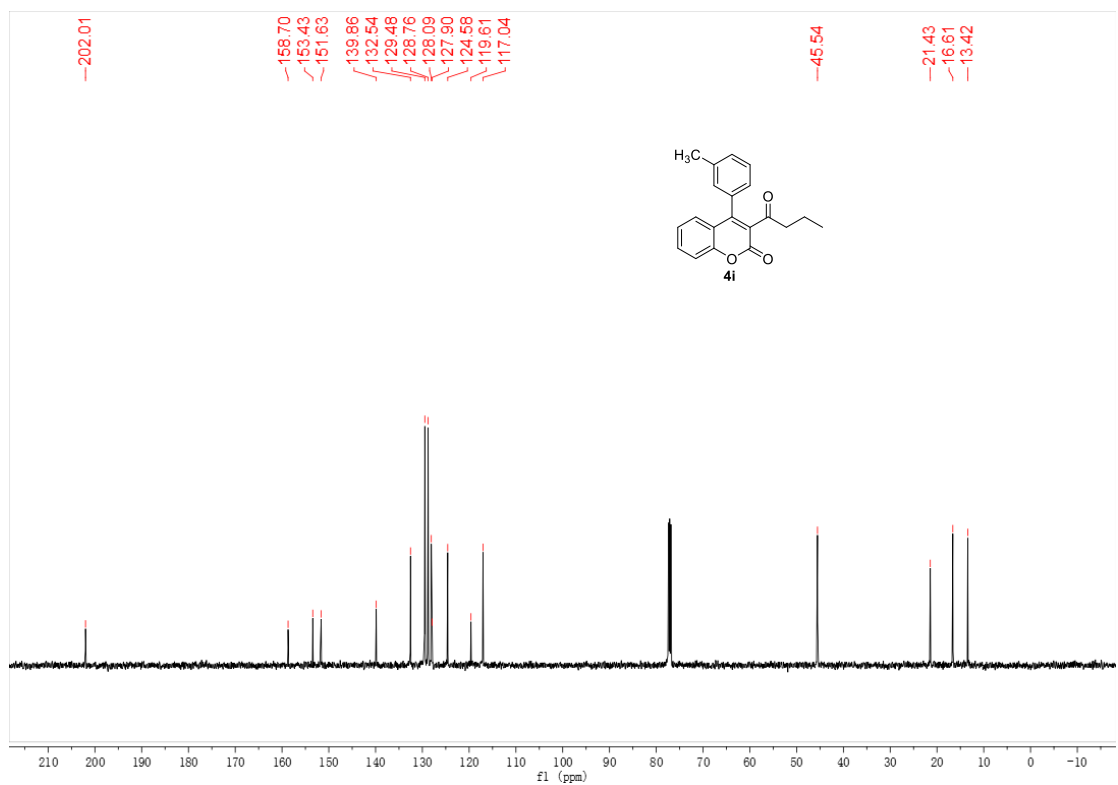



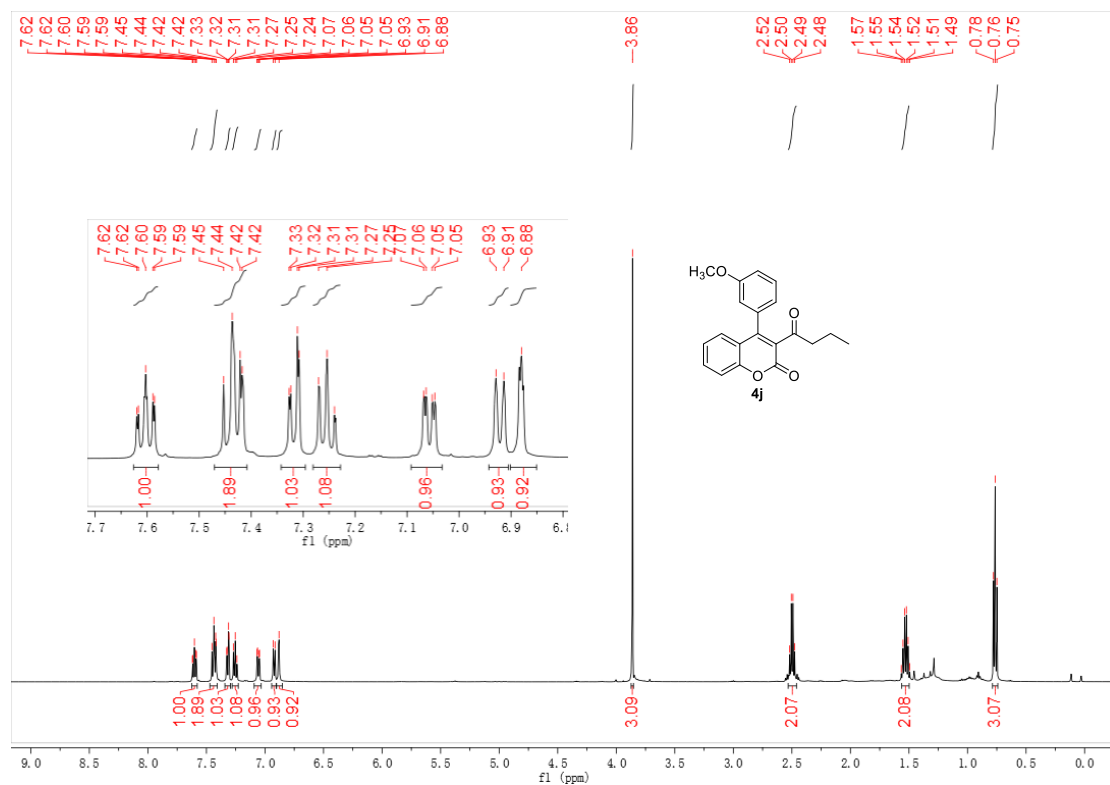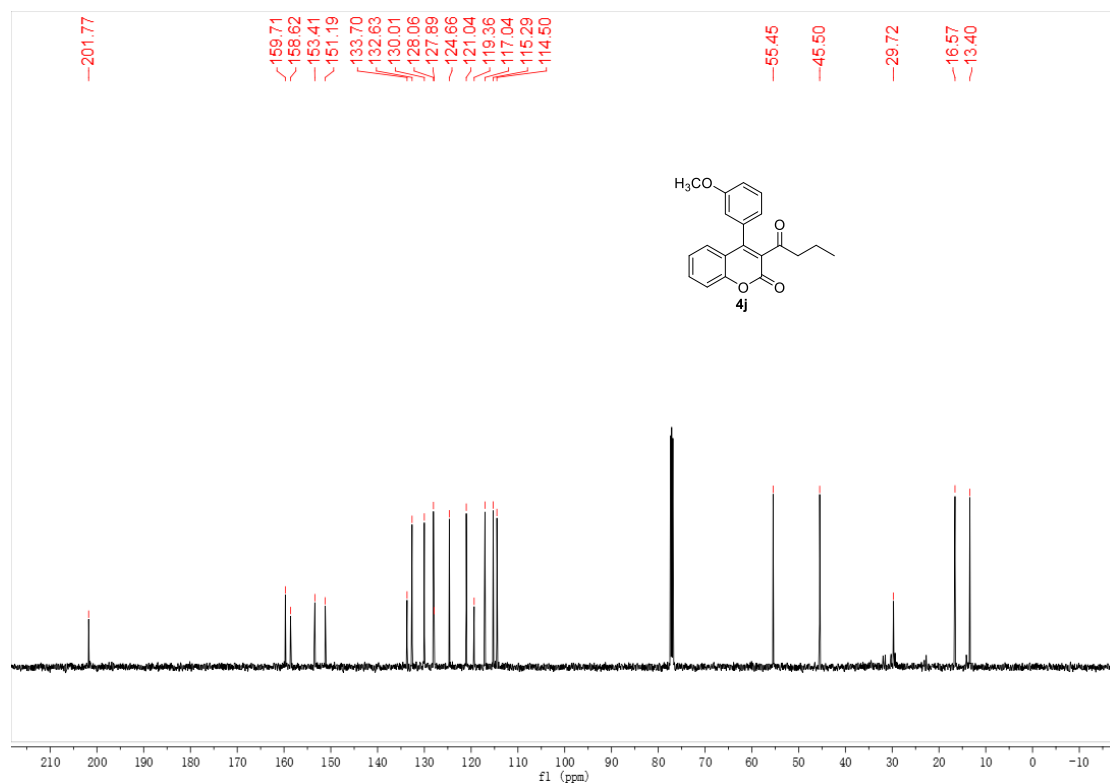

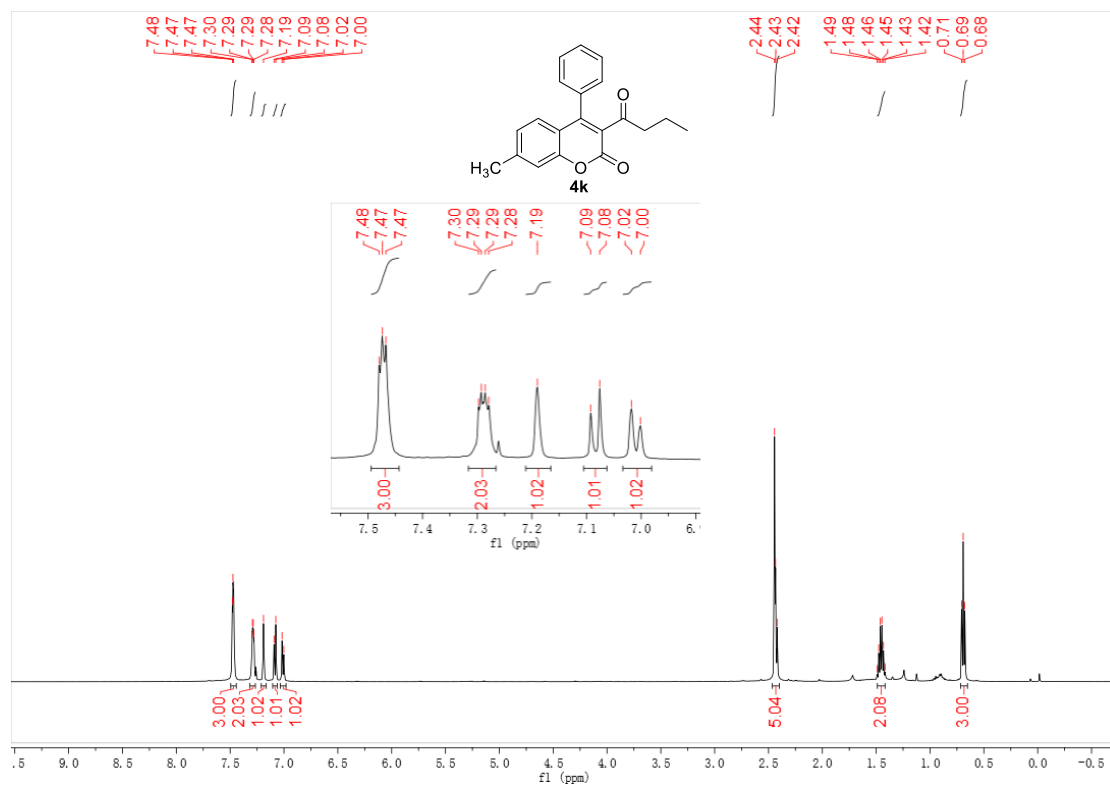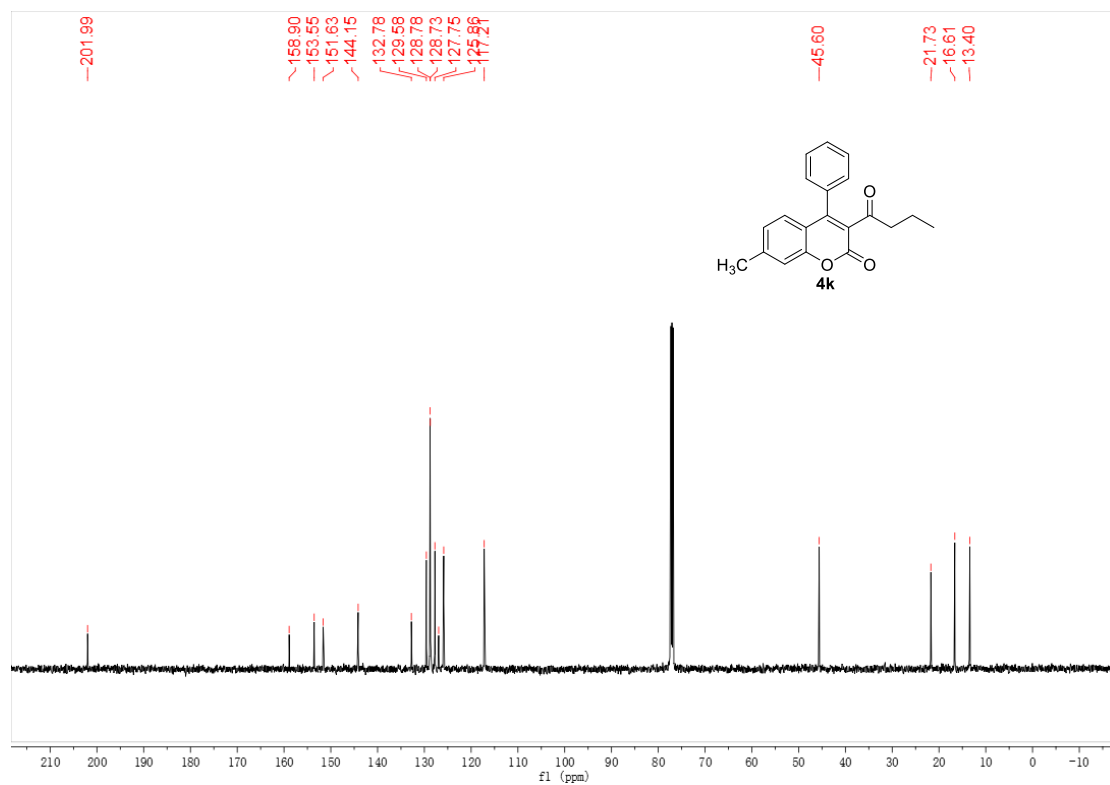

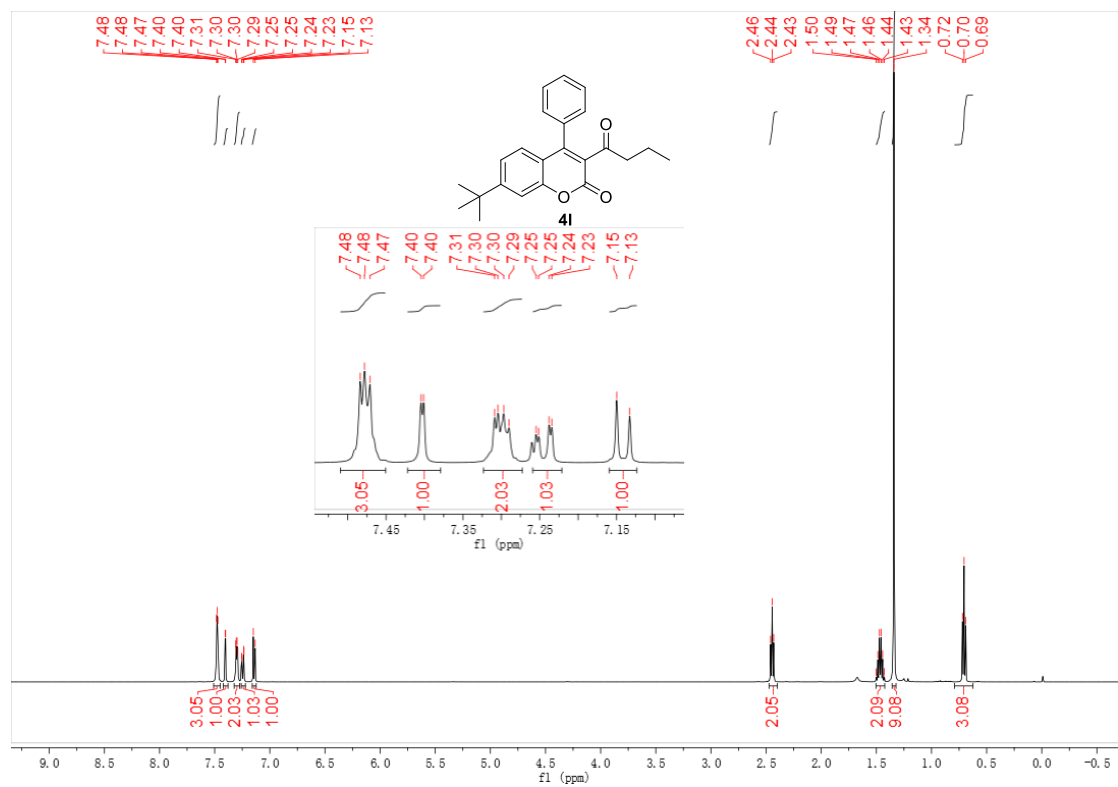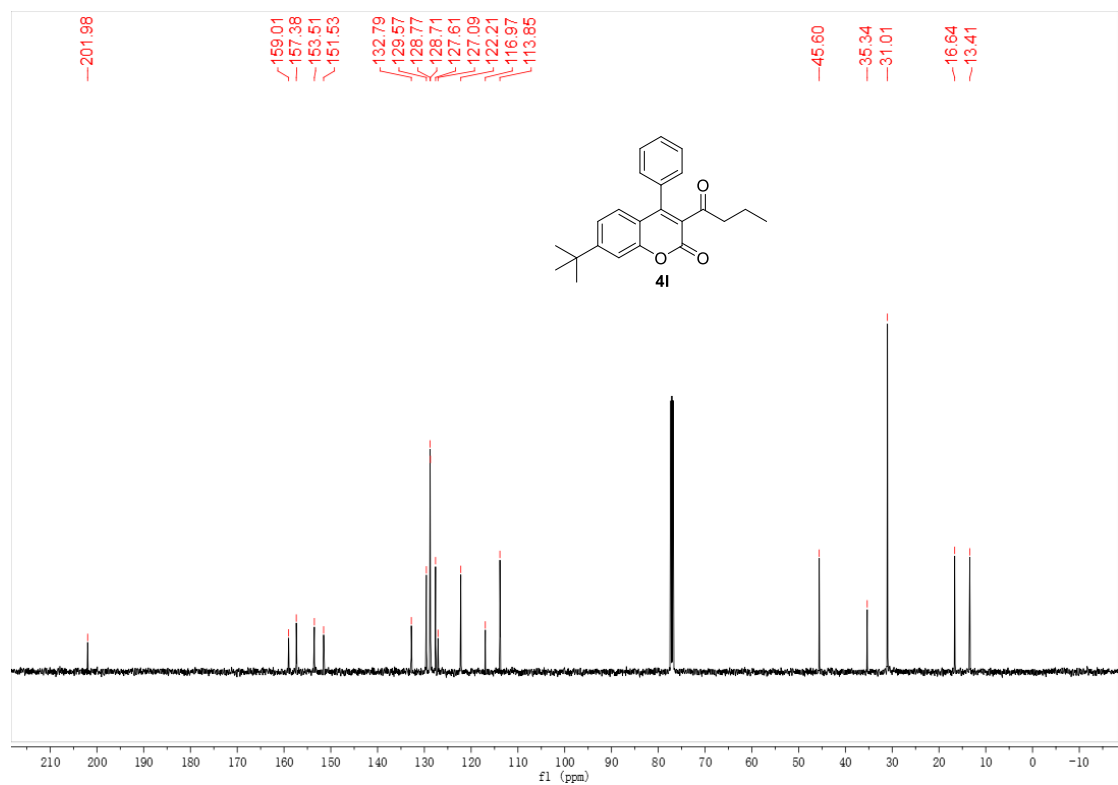

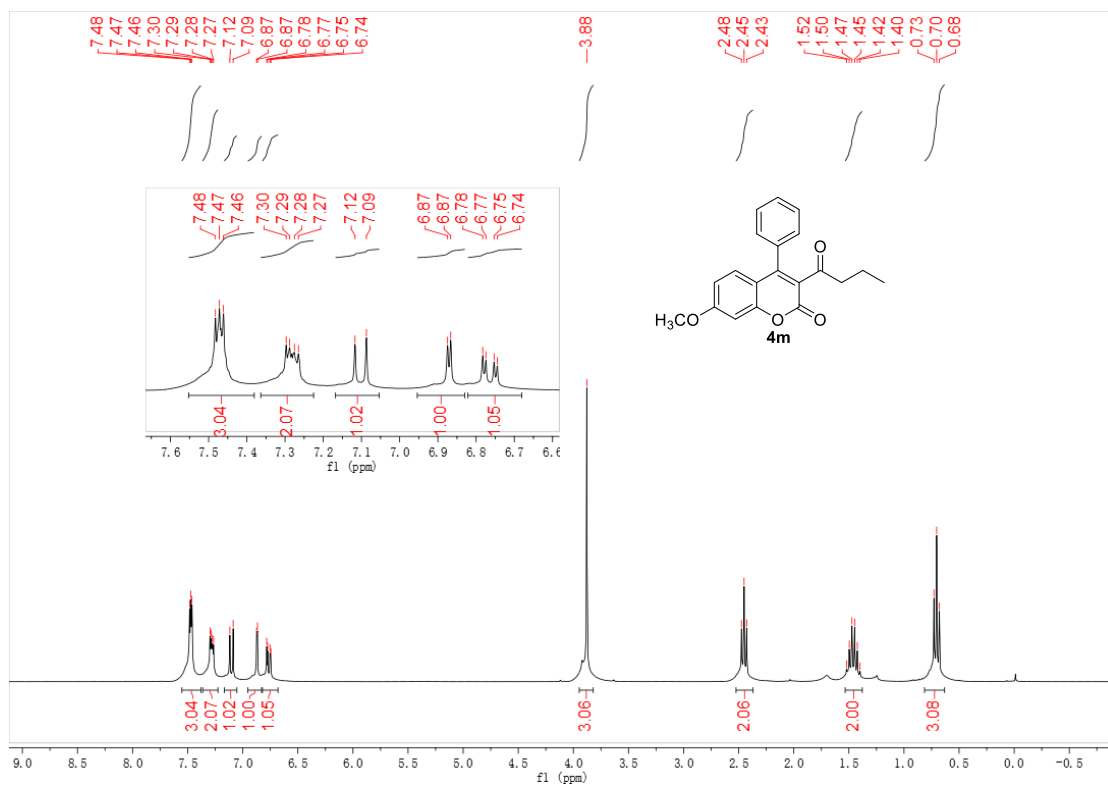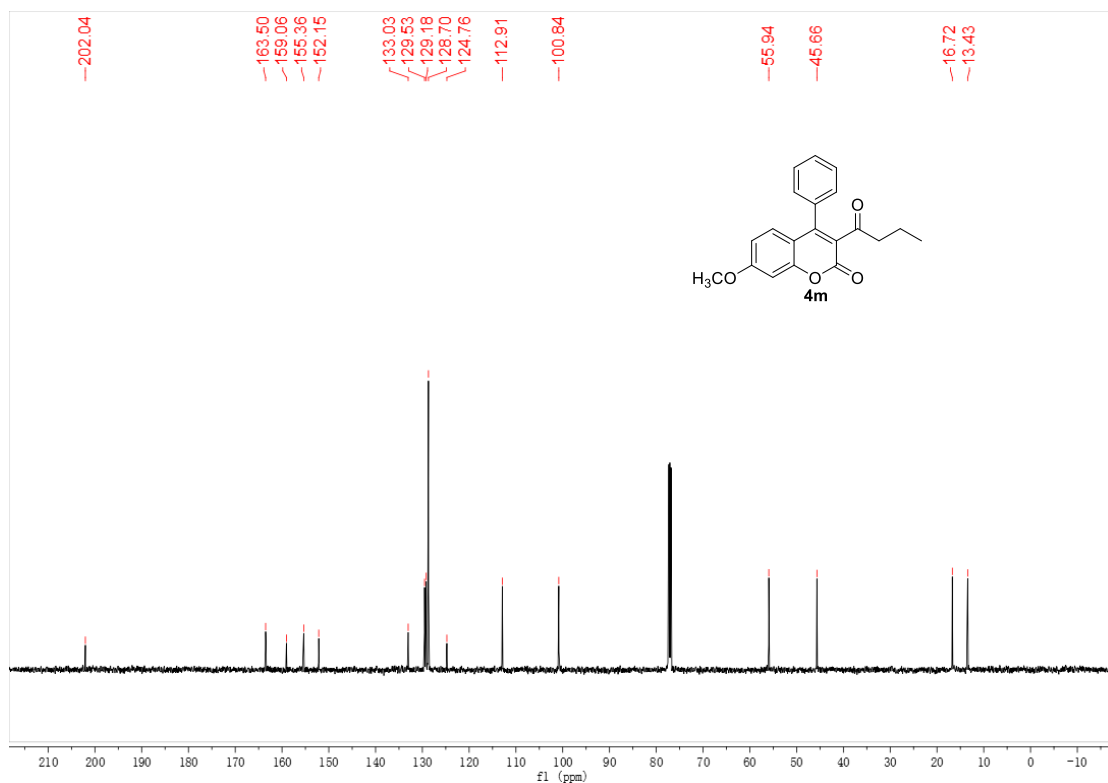

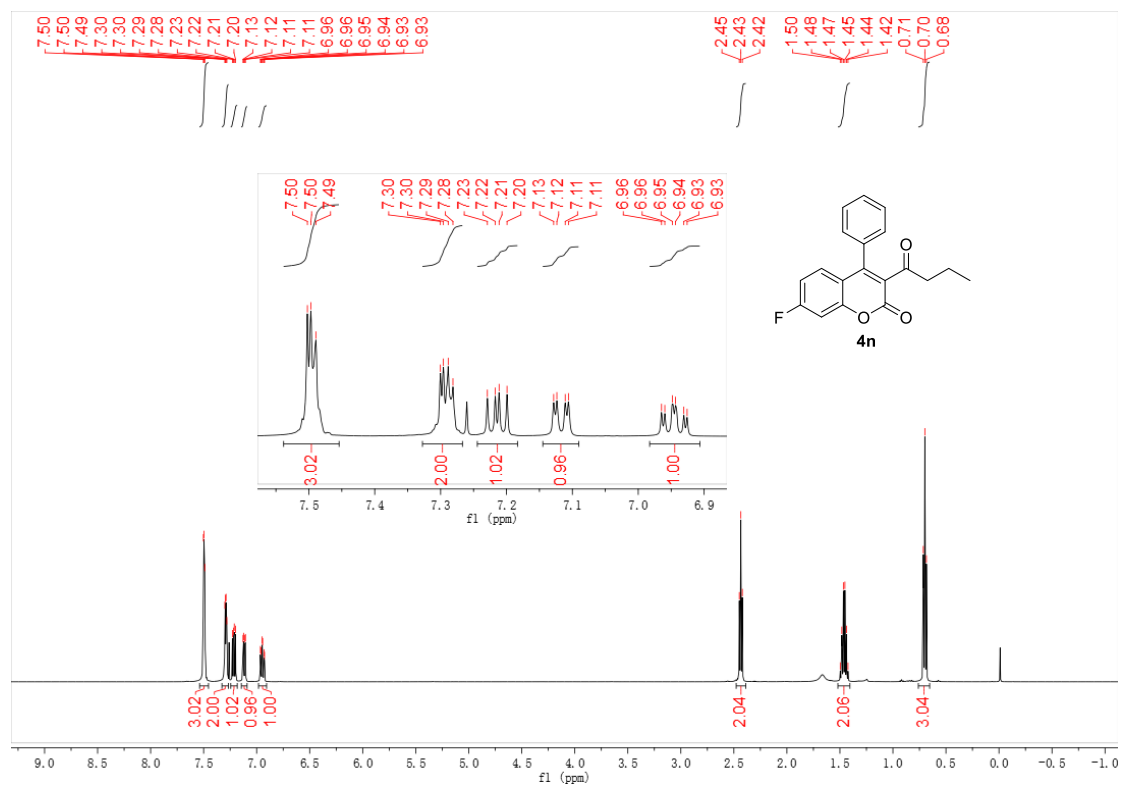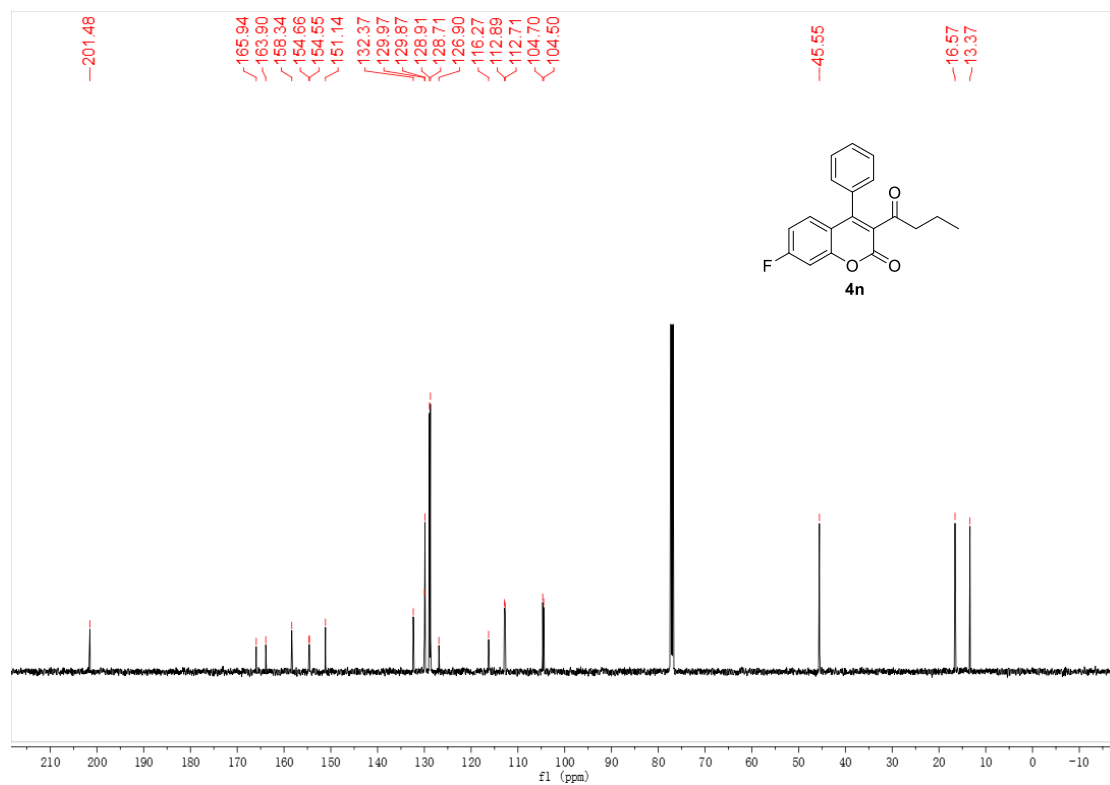

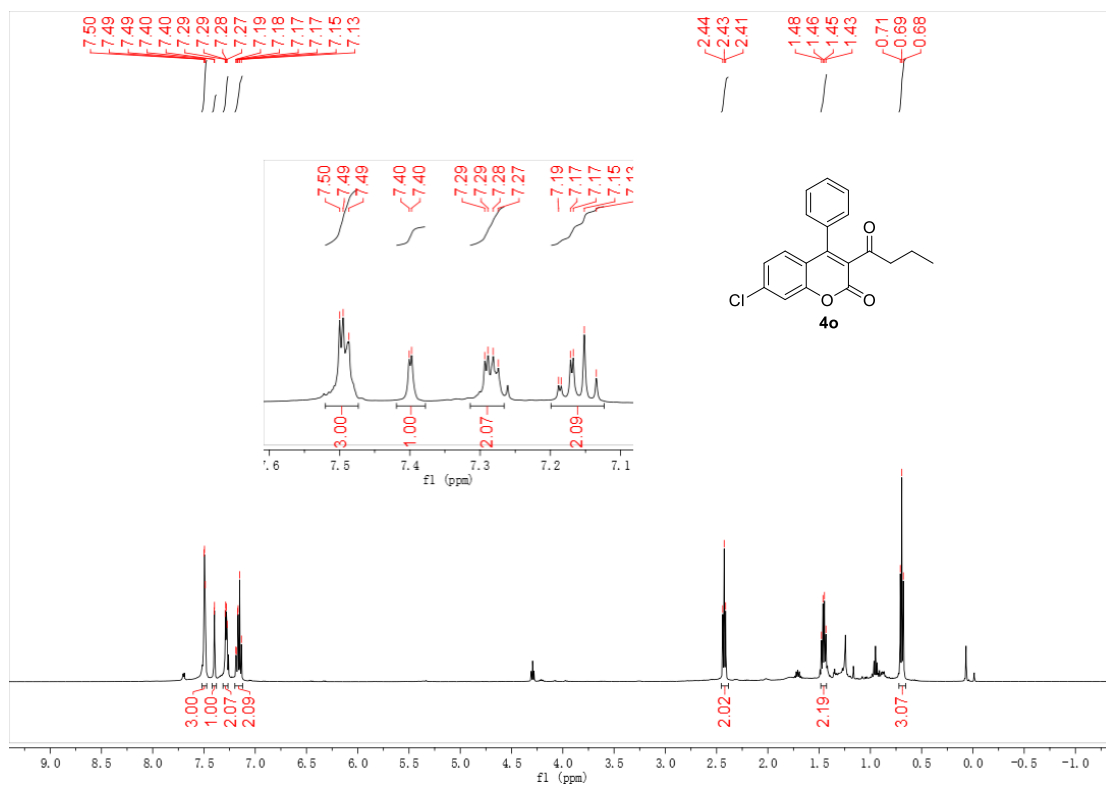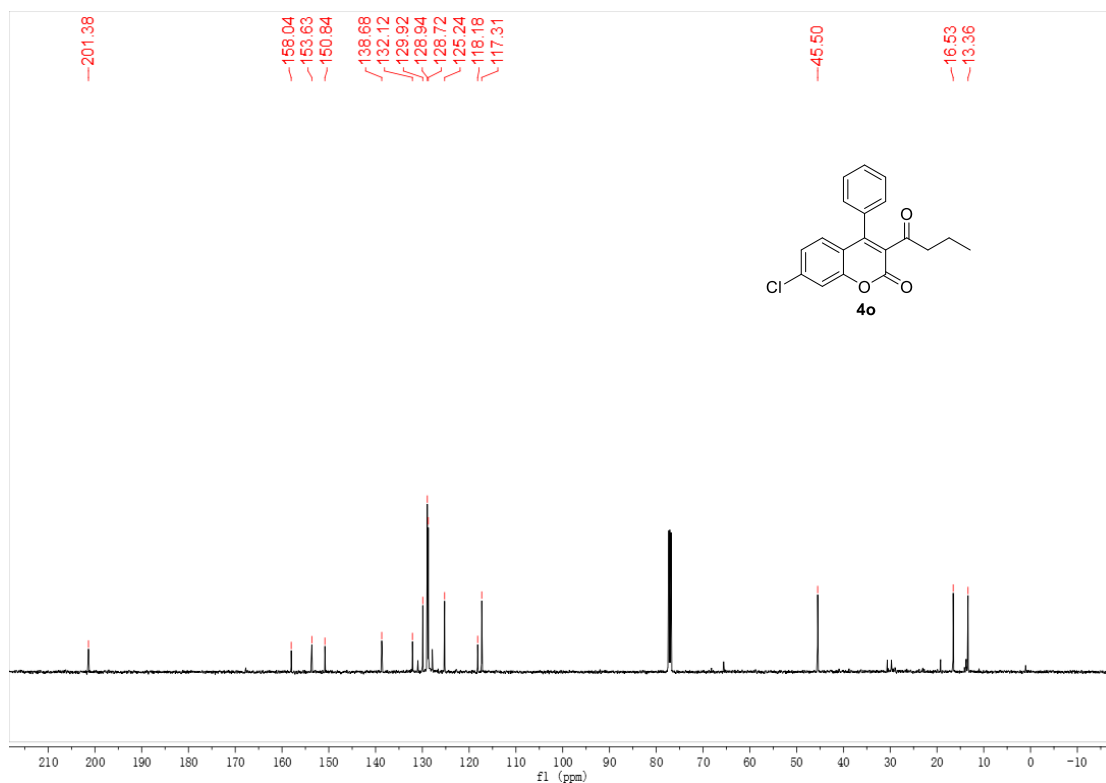

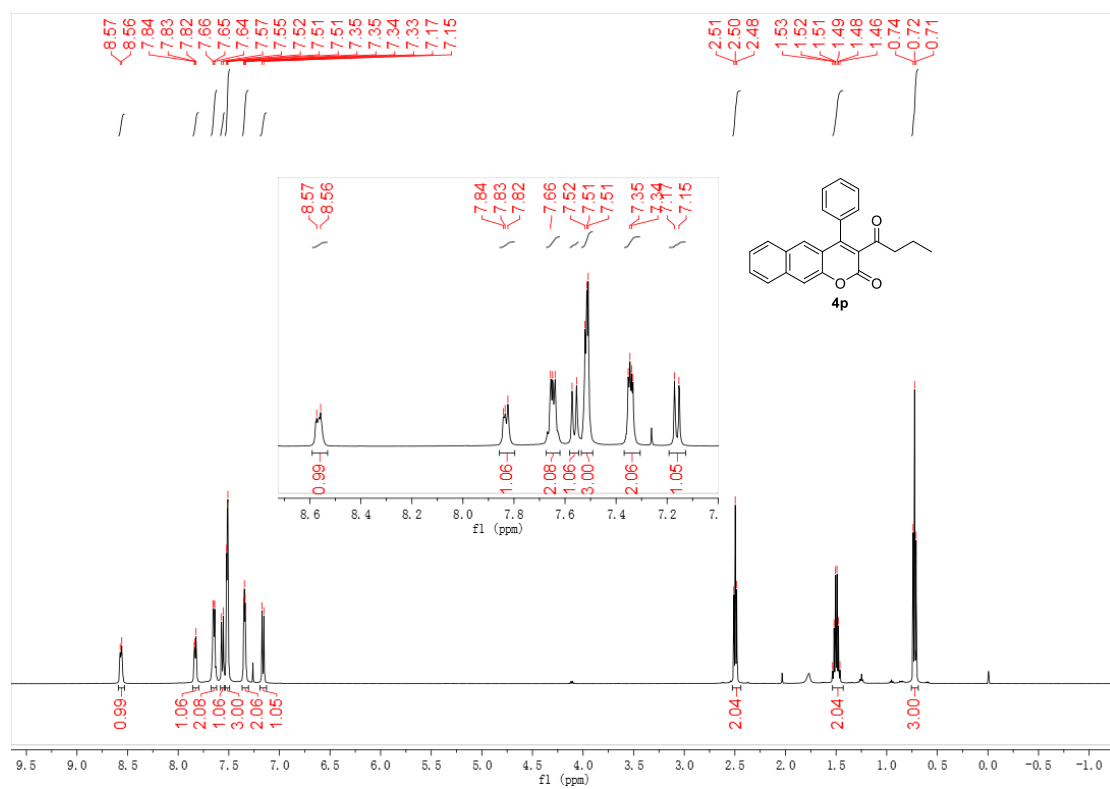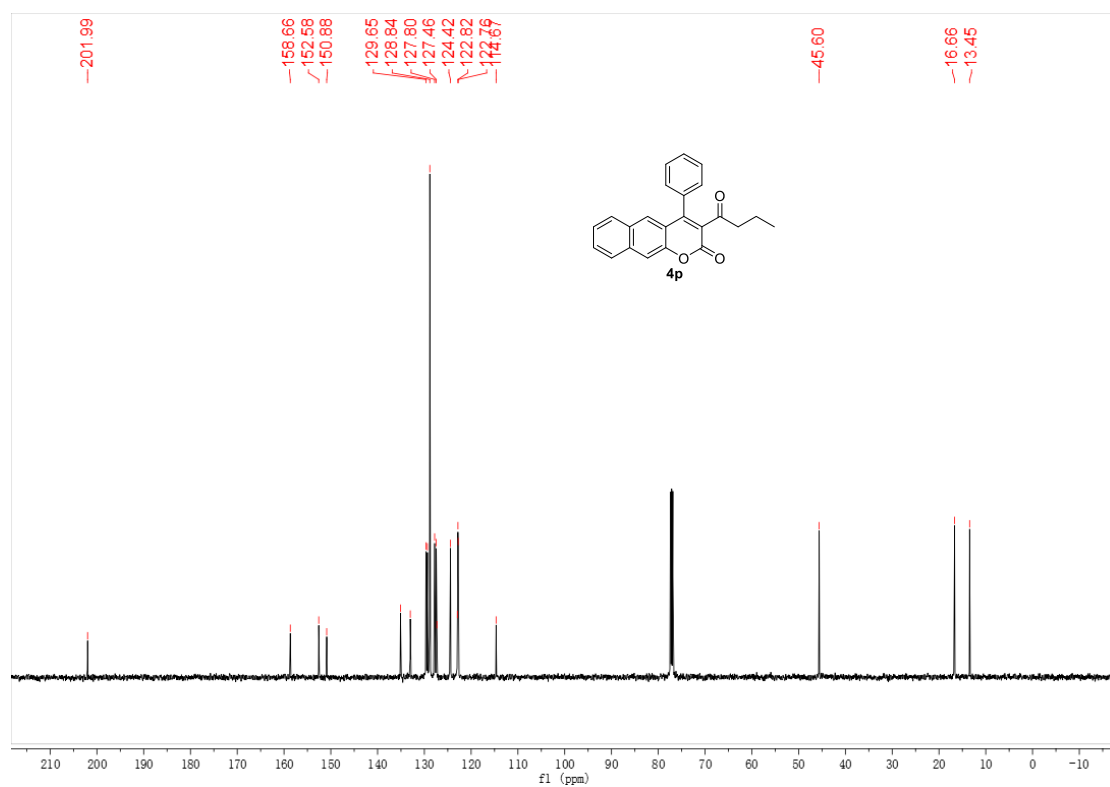

Supplement: c8ob02232a1.pdf [file c8ob02232a1.pdf]
